# Supplementary material for: The rich structural phase behaviour of 2,2,2-trifluoroethanol
Source: Royal Society of Chemistry journal article supplement (doi:10.1039/d3ce00737e), 2023-01-01
Supplement: d3ce00737e1.pdf [file d3ce00737e1.pdf]

## The Rich Structural Phase Behaviour of 2,2,2-Trifluoroethanol

S.A. Barnett<sup>a</sup>, C.L. Bull<sup>b,c</sup>, N.P. Funnell<sup>b</sup> and D.R. Allan<sup>\*a</sup>

<sup>a</sup> Diamond Light Source, Harwell Science and Innovation Campus, Didcot, Oxfordshire, OX11 0DE, U.K.

<sup>b</sup> ISIS Neutron and Muon Source, Rutherford Appleton Laboratory, Didcot, Oxfordshire, OX11 7XN, U.K.

<sup>c</sup> School of Chemistry, University of Edinburgh, David Brewster Road, Edinburgh, EH9 3FJ, U.K.

### 1. Single Crystal Diffraction

Crystals of trifluoroethanol ( $\text{CF}_3\text{CD}_2\text{OD}$ , TFE) Form 4 were grown by compressing the diamond-anvil cell (DAC) beyond the Form 2 regime and then carefully cycling the temperature so that the polycrystalline material was partially melted each time with the objective that just a single crystallite would remain. The experiment was performed twice, using a 200  $\mu\text{m}$  thick tungsten gasket that had been pre-indented to a thickness of  $\sim 100 \mu\text{m}$ , with a 200  $\mu\text{m}$  diameter hole drilled through it, to produce Form 4 being at 1.54(5) GPa and 2.09(5) GPa. No images were taken of the sample in the cell for either experiment.

Crystals of Forms 5, 2 and 3 were grown in sequence from one DAC loading. This loading was not further pressurised to produce Form 4. A steel gasket, with an initial thickness of 200  $\mu\text{m}$  and gasket hole diameter of 400  $\mu\text{m}$ , filled with perdeuterated TFE, was used for the characterisation.

The bolts were tightened to seal the diamond-anvil cell, and then just tweaked a fraction more until the sample was no longer fully liquid.

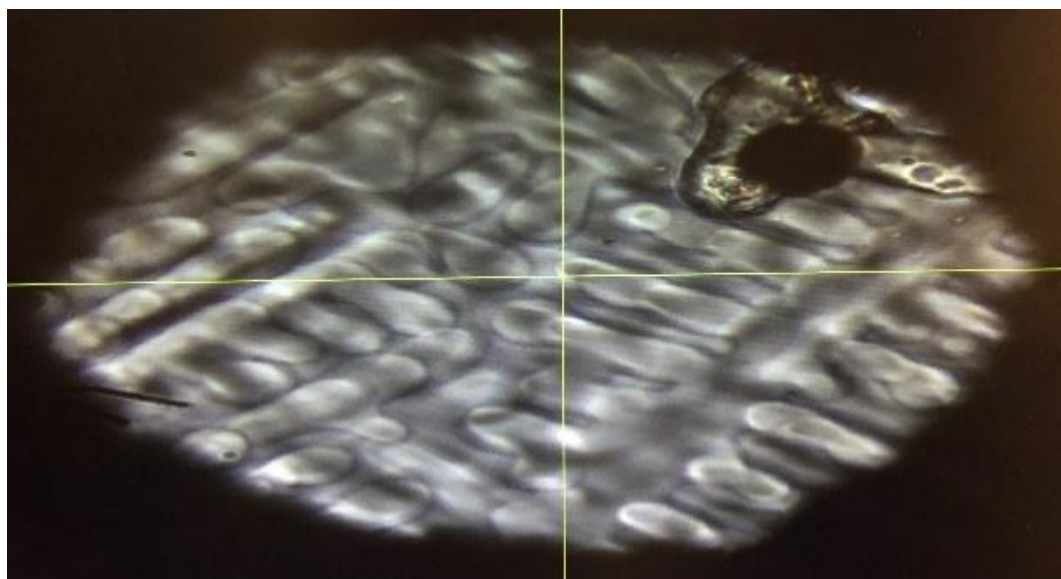

**Figure S1.1:** Image of initial DAC contents after the application of pressure to TFE - the liquid sample crystallised to produce many, relatively large, grains with ill-defined facets. Sample pressure found to be 0.60(5) GPa.

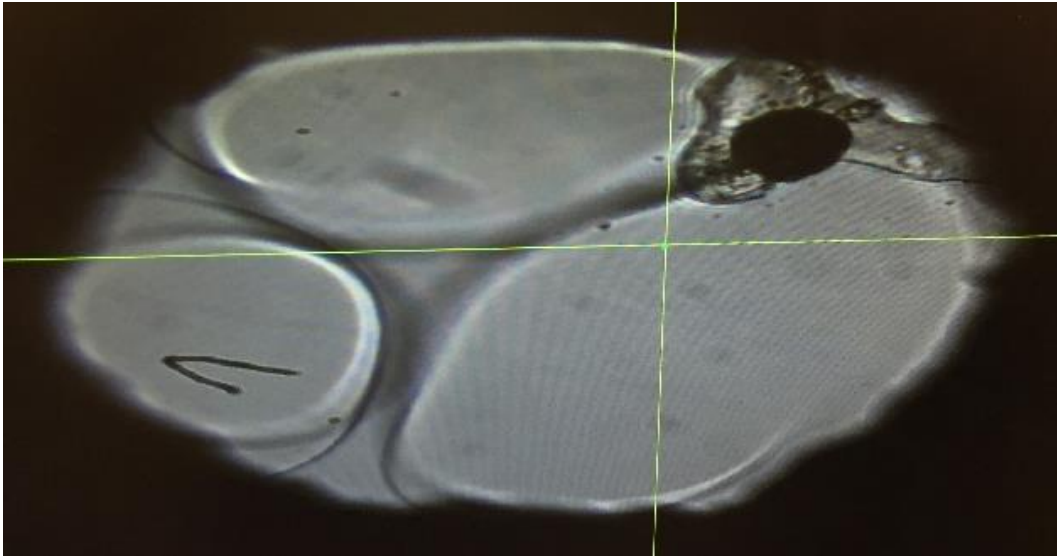

**Figure S1.2:** Image of TFE within the DAC after leaving it, at room temperature, for 2 days – the grains coalesced to form three crystals. Sample pressure found to be 0.60(5) GPa.

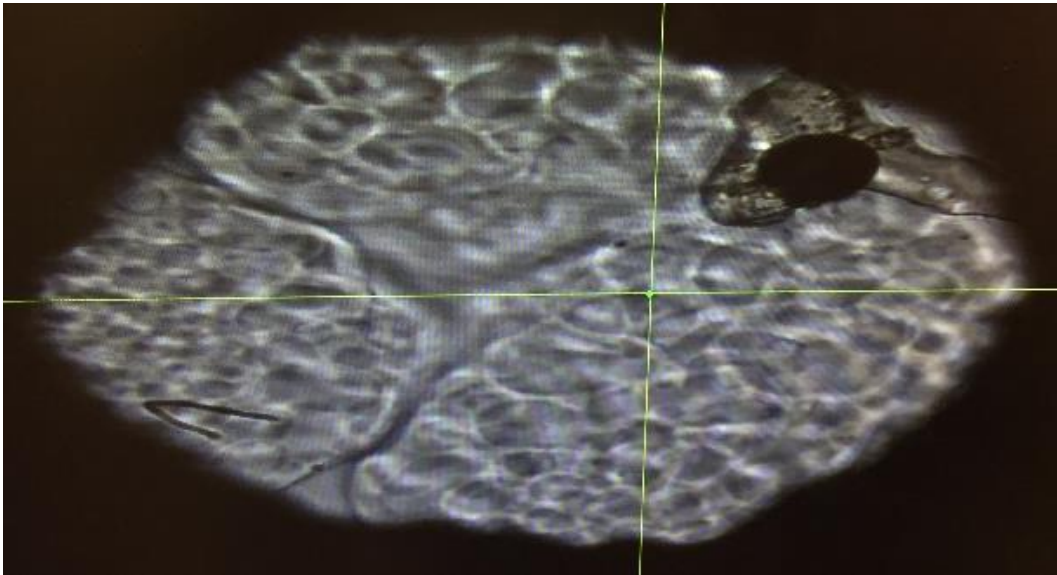

**Figure S1.3:** Image of TFE within the DAC after collecting data on Form 5. Sample pressure found to be 0.63(5) GPa.

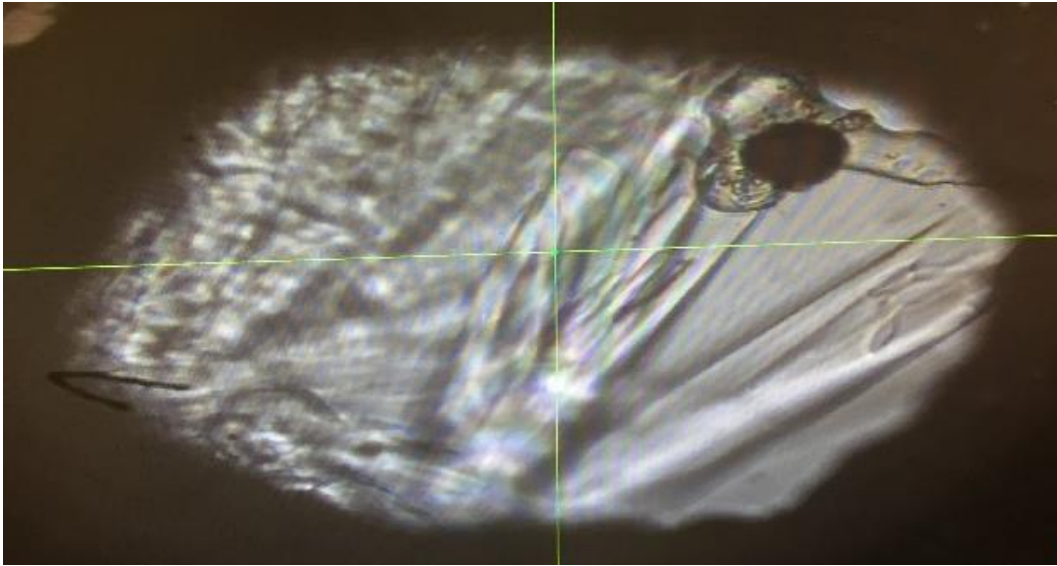

**Figure S1.4:** Pressure in the DAC backed off very slightly and the TFE crystal form changed to laths. Sample pressure found to be 0.55(5) GPa.

The cell was temperature cycled to produce a single crystallite which was allowed to grow for ~30 minutes. Sample pressure found to be 0.60(5) GPa  
The cell was then left for a further 20 minutes and, although there was not much change in crystal growth during this time, there was a pressure drop to 0.55(5) GPa

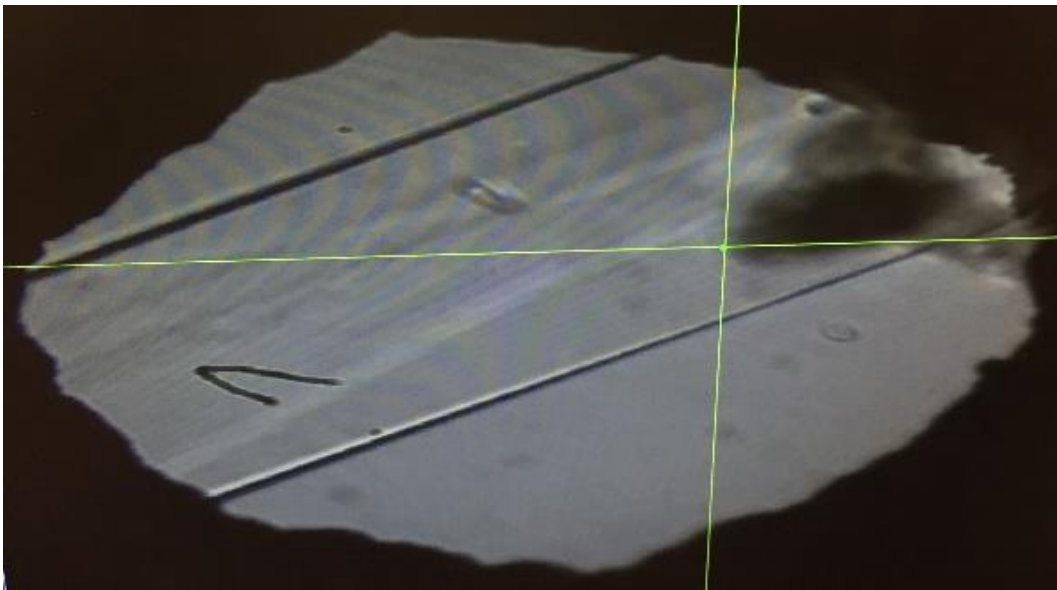

**Figure S1.5:** Image of the DAC with one crystal of TFE Form 2 sitting within the liquid TFE. Sample pressure found to be 0.55(5) GPa.

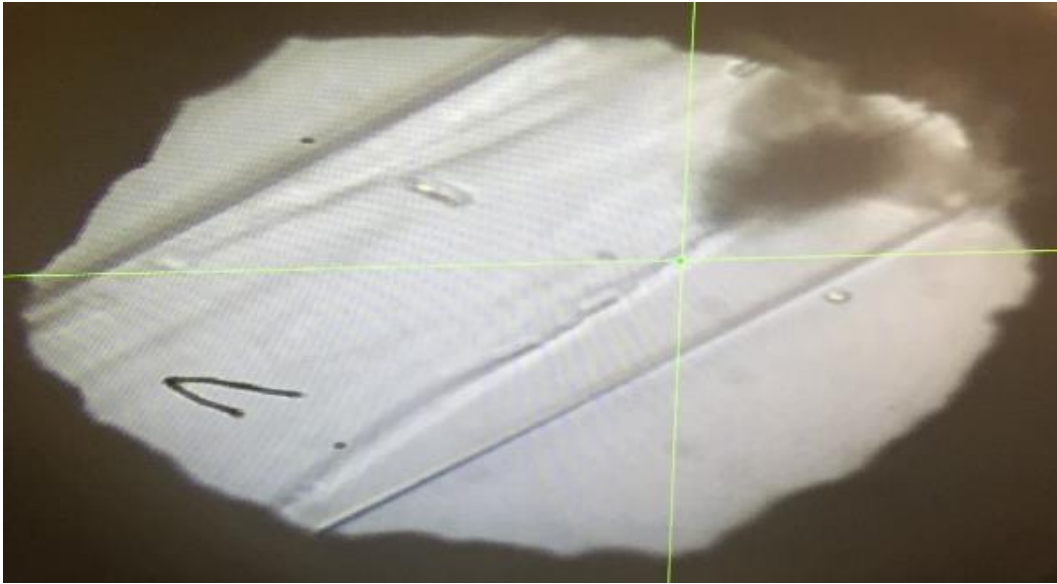

**Figure S1.6:** Image of TFE Form 2 within the DAC, after 1<sup>st</sup> pressure increase. Sample pressure found to be 0.60(5) GPa

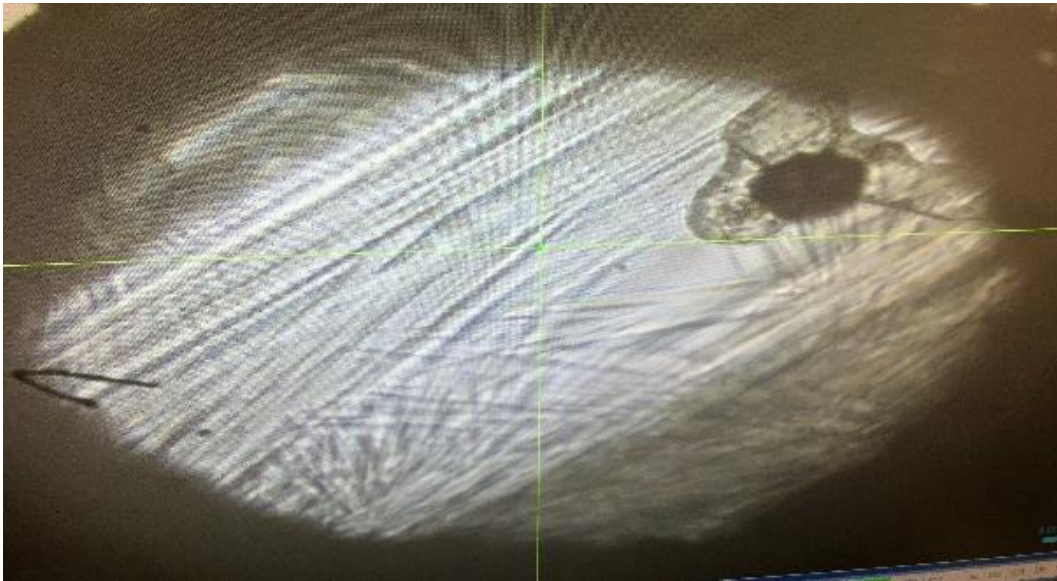

**Figure S1.7:** Image of TFE within the DAC after 2<sup>nd</sup> pressure increase, the TFE crystal form changed to needles. Sample pressure found to be 0.71(5) GPa

The DAC was temperature cycled in an attempt to isolate just one crystal but the sample repeatedly crash-melted, so data was collected on the cell containing a mass of needles.



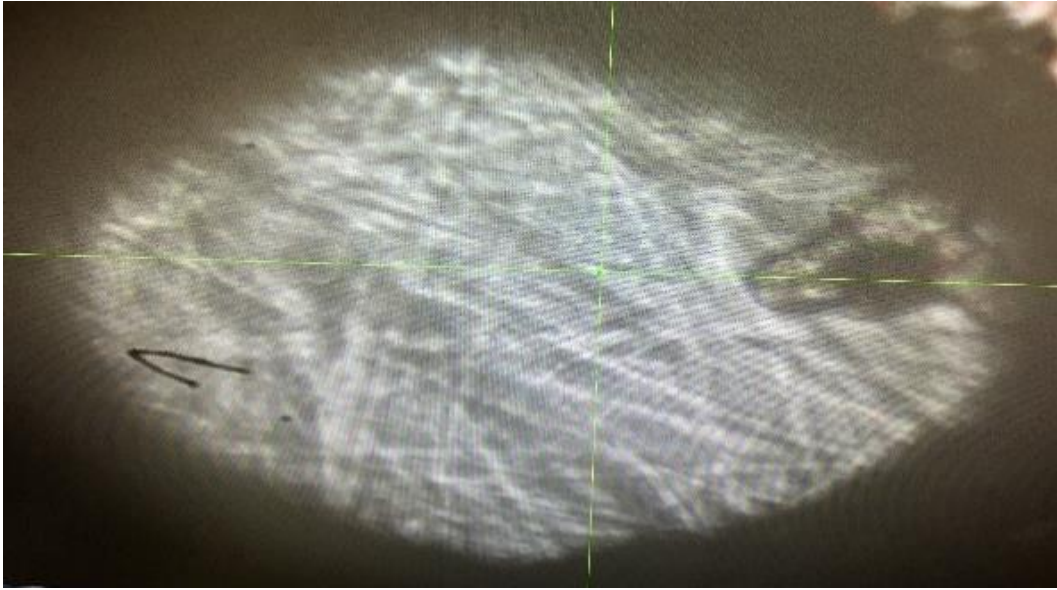

**Figure S1.8:** Image of the cell containing Form 3 after a number melt-cool cycles. Sample pressure was found to be 0.71(5) GPa.

## 2. Powder Neutron Data

**Table S2.1:** Crystallographic data for the high-pressure neutron powder studies of TFE at 295 K on PEARL

| Load (T) | Pressure (GPa) * | wR      | Form | Space Group                        | a (Å)      | b (Å)       | c (Å)      | $\alpha$ (°) | $\beta$ (°) | $\gamma$ (°) | V (Å <sup>3</sup> ) | Density (g/cm <sup>3</sup> ) | Z / Z' | VpM (Å <sup>3</sup> ) ** |
|----------|------------------|---------|------|------------------------------------|------------|-------------|------------|--------------|-------------|--------------|---------------------|------------------------------|--------|--------------------------|
| 12       | 0.44(7)          | 0.09254 | 2    | <i>P</i> -1                        | 4.9130(11) | 8.875(6)    | 9.190(8)   | 111.617(16)  | 103.073(7)  | 90.948(5)    | 360.66(4)           | 1.8980                       | 4 / 2  | 90.165(4)                |
| 14       | 0.83(5)          | 0.08295 | 3    | <i>P</i> 2 <sub>1</sub> / <i>c</i> | 4.8281(5)  | 32.746(4)   | 8.8002(11) | 90           | 91.543(9)   | 90           | 1390.84(18)         | 1.9687                       | 16 / 4 | 86.93(18)                |
| 16       | 0.99(4)          | 0.07284 | 3    | <i>P</i> 2 <sub>1</sub> / <i>c</i> | 4.8122(4)  | 32.660(3)   | 8.7638(9)  | 90           | 91.538(7)   | 90           | 1376.88(14)         | 1.9886                       | 16 / 4 | 86.06(14)                |
| 18       | 1.23(4)          | 0.07536 | 3    | <i>P</i> 2 <sub>1</sub> / <i>c</i> | 4.7947(4)  | 32.565(3)   | 8.7261(9)  | 90           | 91.538(7)   | 90           | 1362.03(14)         | 2.0103                       | 16 / 4 | 85.13(14)                |
| 20       | 1.40(4)          | 0.07322 | 3    | <i>P</i> 2 <sub>1</sub> / <i>c</i> | 4.7715(6)  | 32.446(5)   | 8.6890(13) | 90           | 91.506(11)  | 90           | 1344.7(2)           | 2.0362                       | 16 / 4 | 84.1(2)                  |
| 20       | 1.40(4)          | 0.07322 | 4    | <i>P</i> 2 <sub>1</sub> / <i>c</i> | 4.7312(12) | 16.284(5)   | 8.670(3)   | 90           | 91.96(2)    | 90           | 667.5(2)            | 2.0509                       | 8 / 2  | 83.4(2)                  |
| 22       | 1.46(3)          | 0.07949 | 3    | <i>P</i> 2 <sub>1</sub> / <i>c</i> | 4.7504(15) | 32.331(13)  | 8.672(3)   | 90           | 91.55(2)    | 90           | 1331.3(5)           | 2.0567                       | 16 / 4 | 83.2(5)                  |
| 22       | 1.46(3)          | 0.07949 | 4    | <i>P</i> 2 <sub>1</sub> / <i>c</i> | 4.7074(5)  | 16.232(2)   | 8.6440(10) | 90           | 91.847(9)   | 90           | 660.15(9)           | 2.0738                       | 8 / 2  | 82.52(9)                 |
| 24       | 1.60(6)          | 0.06835 | 4    | <i>P</i> 2 <sub>1</sub> / <i>c</i> | 4.6902(4)  | 16.1700(14) | 8.6078(8)  | 90           | 91.847(6)   | 90           | 652.48(6)           | 2.0982                       | 8 / 2  | 81.56(6)                 |
| 26       | 1.89(7)          | 0.08448 | 4    | <i>P</i> 2 <sub>1</sub> / <i>c</i> | 4.6707(4)  | 16.1199(17) | 8.5772(9)  | 90           | 91.858(8)   | 90           | 645.45(7)           | 2.1211                       | 8 / 2  | 80.68(7)                 |
| 28       | 2.19(7)          | 0.08452 | 4    | <i>P</i> 2 <sub>1</sub> / <i>c</i> | 4.6484(5)  | 16.0630(17) | 8.5406(9)  | 90           | 91.867(8)   | 90           | 637.36(7)           | 2.1480                       | 8 / 2  | 79.67(7)                 |
| 30       | 2.72(9)          | 0.09239 | 4    | <i>P</i> 2 <sub>1</sub> / <i>c</i> | 4.6208(5)  | 15.986(2)   | 8.4957(11) | 90           | 91.913(10)  | 90           | 627.21(8)           | 2.1828                       | 8 / 2  | 78.40(8)                 |
| 36       | 2.91(9)          | 0.09506 | 4    | <i>P</i> 2 <sub>1</sub> / <i>c</i> | 4.5930(6)  | 15.902(2)   | 8.4542(13) | 90           | 91.954(11)  | 90           | 617.10(9)           | 2.2185                       | 8 / 2  | 77.14(9)                 |
| 40       | 3.30(9)          | 0.09466 | 4    | <i>P</i> 2 <sub>1</sub> / <i>c</i> | 4.5636(8)  | 15.816(3)   | 8.3995(15) | 90           | 92.054(14)  | 90           | 605.86(11)          | 2.2594                       | 8 / 2  | 75.73(11)                |
| 44       | 3.73(10)         | 0.09743 | 4    | <i>P</i> 2 <sub>1</sub> / <i>c</i> | 4.5366(8)  | 15.745(3)   | 8.3437(15) | 90           | 92.089(14)  | 90           | 595.58(11)          | 2.2987                       | 8 / 2  | 74.45(11)                |
| 48       | 4.36(12)         | 0.10133 | 4    | <i>P</i> 2 <sub>1</sub> / <i>c</i> | 4.5127(9)  | 15.662(3)   | 8.3145(18) | 90           | 92.126(17)  | 90           | 587.25(13)          | 2.3313                       | 8 / 2  | 73.41(13)                |
| 52       | 4.88(14)         | 0.11097 | 4    | <i>P</i> 2 <sub>1</sub> / <i>c</i> | 4.4867(11) | 15.568(4)   | 8.283(2)   | 90           | 92.18(2)    | 90           | 578.17(15)          | 2.3679                       | 8 / 2  | 72.27(15)                |
| 56       | 5.42(15)         | 0.11741 | 4    | <i>P</i> 2 <sub>1</sub> / <i>c</i> | 4.4561(14) | 15.495(5)   | 8.256(3)   | 90           | 92.31(3)    | 90           | 569.58(18)          | 2.4036                       | 8 / 2  | 71.20(18)                |
| 60       | 6.14(21)         | 0.10830 | 4    | <i>P</i> 2 <sub>1</sub> / <i>c</i> | 4.4333(18) | 15.383(6)   | 8.247(3)   | 90           | 92.36(3)    | 90           | 562.0(2)            | 2.4362                       | 8 / 2  | 70.3(2)                  |

\* Pressure calculated using the refined value for the Pb  $a$ -axis<sup>1</sup>

\*\* VpM: volume per molecule calculated by dividing the unit cell volume by Z and used for Figure 9 of the main text (volume per formula unit)

**Table S2.2a:** Atomic positions for the structures refined from the high-pressure neutron powder-diffraction studies at 295 K on PEARL (Forms 2 and 3)

| Form 2<br>Atom | 12T<br>0.44 GPa                | Form 3<br>Atom | 14T<br>0.83 GPa                | 16T<br>0.99 GPa                | 18T<br>1.23 GPa                | 20T<br>1.40 GPa                | 22T<br>1.46 GPa                |                               |
|----------------|--------------------------------|----------------|--------------------------------|--------------------------------|--------------------------------|--------------------------------|--------------------------------|-------------------------------|
| C1             | x<br>y<br>z                    | C1             | x<br>y<br>z                    | 0.44601<br>0.53562<br>0.23111  | 0.45046<br>0.53404<br>0.23052  | 0.45435<br>0.53366<br>0.23003  | 0.45412<br>0.53355<br>0.22988  | 0.45382<br>0.53355<br>0.22977 |
| D1A            | 1.12883<br>0.22824<br>0.33509  | D1A            | 0.24881<br>0.53904<br>0.20703  | 0.25226<br>0.53837<br>0.20999  | 0.25547<br>0.53797<br>0.20907  | 0.25441<br>0.53788<br>0.20885  | 0.25306<br>0.53789<br>0.20868  |                               |
| D1B            | 0.88692<br>0.31825<br>0.40866  | D1B            | 0.53876<br>0.52524<br>0.14484  | 0.53483<br>0.52251<br>0.14305  | 0.53965<br>0.52212<br>0.14234  | 0.53978<br>0.52192<br>0.14188  | 0.53988<br>0.52193<br>0.14153  |                               |
| O1             | 1.01130<br>0.14885<br>0.48410  | O1             | 0.47517<br>0.50771<br>0.35021  | 0.48113<br>0.50678<br>0.35239  | 0.48470<br>0.50633<br>0.35244  | 0.48461<br>0.50601<br>0.35273  | 0.48453<br>0.50603<br>0.35295  |                               |
| D1             | 0.89080<br>0.14311<br>0.53137  | D1             | 0.62402<br>0.49609<br>0.36515  | 0.62531<br>0.49354<br>0.36297  | 0.63201<br>0.49382<br>0.36546  | 0.63254<br>0.49341<br>0.36580  | 0.63323<br>0.49343<br>0.36605  |                               |
| C2             | 0.74558<br>0.10533<br>0.22030  | C2             | 0.56155<br>0.57575<br>0.27492  | 0.57879<br>0.57392<br>0.26807  | 0.58255<br>0.57368<br>0.26797  | 0.58287<br>0.57386<br>0.26796  | 0.58326<br>0.57385<br>0.26795  |                               |
| F1             | 0.85056<br>-0.02448<br>0.13568 | F1             | 0.40780<br>0.59509<br>0.37347  | 0.44193<br>0.59420<br>0.37229  | 0.44138<br>0.59434<br>0.37020  | 0.44110<br>0.59467<br>0.37056  | 0.44080<br>0.59465<br>0.37082  |                               |
| F2             | 0.52760<br>0.05322<br>0.25791  | F2             | 0.81317<br>0.57228<br>0.33672  | 0.83760<br>0.56960<br>0.32016  | 0.84021<br>0.56935<br>0.32352  | 0.84161<br>0.56950<br>0.32371  | 0.84338<br>0.56949<br>0.32385  |                               |
| F3             | 0.60111<br>0.15423<br>0.11335  | F3             | 0.62371<br>0.60340<br>0.17694  | 0.63269<br>0.60109<br>0.16602  | 0.64139<br>0.60067<br>0.16534  | 0.64195<br>0.60104<br>0.16496  | 0.64259<br>0.60103<br>0.16468  |                               |
| C3             | 0.61270<br>0.28589<br>0.77892  | C3             | 0.04479<br>0.42867<br>0.31222  | 0.05131<br>0.43037<br>0.30894  | 0.05126<br>0.43030<br>0.31013  | 0.05158<br>0.43026<br>0.31036  | 0.05201<br>0.43026<br>0.31053  |                               |
| D3A            | 0.74961<br>0.26451<br>0.86223  | D3A            | -0.06085<br>0.40829<br>0.36719 | -0.03870<br>0.40828<br>0.36410 | -0.04123<br>0.40816<br>0.36455 | -0.04129<br>0.40796<br>0.36497 | -0.04132<br>0.40797<br>0.36529 |                               |
| D3B            | 0.43185<br>0.28913<br>0.80123  | D3B            | 0.23757<br>0.42220<br>0.31793  | 0.24792<br>0.42644<br>0.31106  | 0.24810<br>0.42587<br>0.31163  | 0.24926<br>0.42580<br>0.31187  | 0.25072<br>0.42580<br>0.31204  |                               |
| O2             | 0.59710<br>0.15976<br>0.63038  | O2             | 0.00389<br>0.46666<br>0.37980  | -0.00865<br>0.46733<br>0.38071 | -0.00420<br>0.46724<br>0.38429 | -0.00411<br>0.46748<br>0.38478 | -0.00394<br>0.46746<br>0.38516 |                               |

|    |                               |     |                                |                                |                                |                                |                                |
|----|-------------------------------|-----|--------------------------------|--------------------------------|--------------------------------|--------------------------------|--------------------------------|
| D2 | 0.47361<br>0.15343<br>0.55086 | D2  | 0.11077<br>0.48548<br>0.36264  | 0.10160<br>0.48644<br>0.37622  | 0.10946<br>0.48605<br>0.38143  | 0.11003<br>0.48642<br>0.38191  | 0.11080<br>0.48640<br>0.38227  |
| C4 | 0.70702<br>0.44392<br>0.77765 | C4  | -0.05470<br>0.42883<br>0.15233 | -0.05708<br>0.43017<br>0.14993 | -0.05858<br>0.43095<br>0.15067 | -0.05872<br>0.43092<br>0.15032 | -0.05894<br>0.43092<br>0.15006 |
| F4 | 0.75725<br>0.56110<br>0.92321 | F4  | -0.04497<br>0.39193<br>0.09169 | -0.04549<br>0.39318<br>0.08901 | -0.03210<br>0.39478<br>0.08375 | -0.03213<br>0.39448<br>0.08316 | -0.03225<br>0.39449<br>0.08272 |
| F5 | 0.52082<br>0.49066<br>0.67942 | F5  | 0.09135<br>0.45327<br>0.06638  | 0.08115<br>0.45508<br>0.06106  | 0.06875<br>0.45818<br>0.06523  | 0.06914<br>0.45834<br>0.06458  | 0.06955<br>0.45833<br>0.06409  |
| F6 | 0.94429<br>0.47230<br>0.74918 | F6  | -0.30899<br>0.43632<br>0.11242 | -0.31502<br>0.43690<br>0.11399 | -0.32006<br>0.43572<br>0.11594 | -0.32131<br>0.43572<br>0.11547 | -0.32292<br>0.43572<br>0.11511 |
|    |                               | C5  | 0.94018<br>0.72373<br>0.30113  | 0.95169<br>0.72385<br>0.31819  | 0.95635<br>0.72327<br>0.31937  | 0.95596<br>0.72337<br>0.31929  | 0.95546<br>0.72337<br>0.31922  |
|    |                               | D5A | 1.02939<br>0.73987<br>0.22306  | 1.02727<br>0.74020<br>0.23580  | 1.03565<br>0.73987<br>0.23823  | 1.03559<br>0.74010<br>0.23785  | 1.03547<br>0.74009<br>0.23757  |
|    |                               | D5B | 0.75016<br>0.71919<br>0.27343  | 0.75949<br>0.71832<br>0.29785  | 0.76333<br>0.71821<br>0.29733  | 0.76212<br>0.71828<br>0.29716  | 0.76061<br>0.71828<br>0.29704  |
|    |                               | O3  | 0.95462<br>0.74547<br>0.43742  | 0.97848<br>0.74612<br>0.45363  | 0.98237<br>0.74493<br>0.45692  | 0.98209<br>0.74520<br>0.45733  | 0.98180<br>0.74519<br>0.45764  |
|    |                               | D3  | 1.10092<br>0.75633<br>0.46461  | 1.11965<br>0.75962<br>0.47092  | 1.10204<br>0.76283<br>0.46666  | 1.10227<br>0.76323<br>0.46711  | 1.10260<br>0.76321<br>0.46744  |
|    |                               | C6  | 1.08713<br>0.68439<br>0.31582  | 1.10907<br>0.68516<br>0.32879  | 1.11035<br>0.68410<br>0.32856  | 1.11060<br>0.68392<br>0.32851  | 1.11092<br>0.68393<br>0.32847  |
|    |                               | F7  | 1.33547<br>0.68822<br>0.38033  | 1.34876<br>0.68930<br>0.40368  | 1.35236<br>0.68762<br>0.40280  | 1.35364<br>0.68746<br>0.40301  | 1.35526<br>0.68747<br>0.40317  |
|    |                               | F8  | 0.94753<br>0.65800<br>0.39788  | 0.96719<br>0.65637<br>0.39878  | 0.96599<br>0.65546<br>0.39892  | 0.96564<br>0.65506<br>0.39912  | 0.96524<br>0.65508<br>0.39927  |
|    |                               | F9  | 1.12444<br>0.66027<br>0.20211  | 1.16773<br>0.66344<br>0.21082  | 1.16521<br>0.66235<br>0.20938  | 1.16570<br>0.66201<br>0.20890  | 1.16624<br>0.66202<br>0.20854  |



|  |  |     |                               |                               |                               |                               |                               |
|--|--|-----|-------------------------------|-------------------------------|-------------------------------|-------------------------------|-------------------------------|
|  |  | C7  | 0.59760<br>0.81853<br>0.42267 | 0.56580<br>0.81874<br>0.42158 | 0.55032<br>0.81939<br>0.41801 | 0.55045<br>0.81945<br>0.41827 | 0.55065<br>0.81945<br>0.41846 |
|  |  | D7A | 0.79850<br>0.82151<br>0.43225 | 0.76607<br>0.82304<br>0.43260 | 0.75062<br>0.82436<br>0.42918 | 0.75159<br>0.82446<br>0.42948 | 0.75284<br>0.82445<br>0.42970 |
|  |  | D7B | 0.50849<br>0.84037<br>0.47401 | 0.46856<br>0.84038<br>0.47021 | 0.44928<br>0.84115<br>0.46439 | 0.44899<br>0.84137<br>0.46481 | 0.44868<br>0.84136<br>0.46513 |
|  |  | O4  | 0.52325<br>0.78164<br>0.48957 | 0.49996<br>0.78177<br>0.49167 | 0.48860<br>0.78264<br>0.49190 | 0.48847<br>0.78242<br>0.49242 | 0.48838<br>0.78243<br>0.49281 |
|  |  | D4  | 0.62495<br>0.76170<br>0.48220 | 0.59890<br>0.76165<br>0.47909 | 0.59482<br>0.76301<br>0.48496 | 0.59514<br>0.76265<br>0.48545 | 0.59561<br>0.76266<br>0.48582 |
|  |  | C8  | 0.51821<br>0.81906<br>0.25971 | 0.49099<br>0.81771<br>0.25732 | 0.47702<br>0.81698<br>0.25305 | 0.47683<br>0.81702<br>0.25271 | 0.47657<br>0.81702<br>0.25245 |
|  |  | F10 | 0.54572<br>0.85091<br>0.17499 | 0.50862<br>0.84936<br>0.16982 | 0.49920<br>0.84783<br>0.16120 | 0.49912<br>0.84810<br>0.16053 | 0.49892<br>0.84808<br>0.16002 |
|  |  | F11 | 0.24715<br>0.81541<br>0.23831 | 0.22151<br>0.81164<br>0.23388 | 0.20614<br>0.81135<br>0.22930 | 0.20482<br>0.81135<br>0.22887 | 0.20312<br>0.81135<br>0.22855 |
|  |  | F12 | 0.63558<br>0.78939<br>0.18319 | 0.62252<br>0.78860<br>0.18402 | 0.60667<br>0.78679<br>0.18378 | 0.60704<br>0.78660<br>0.18320 | 0.60741<br>0.78661<br>0.18275 |

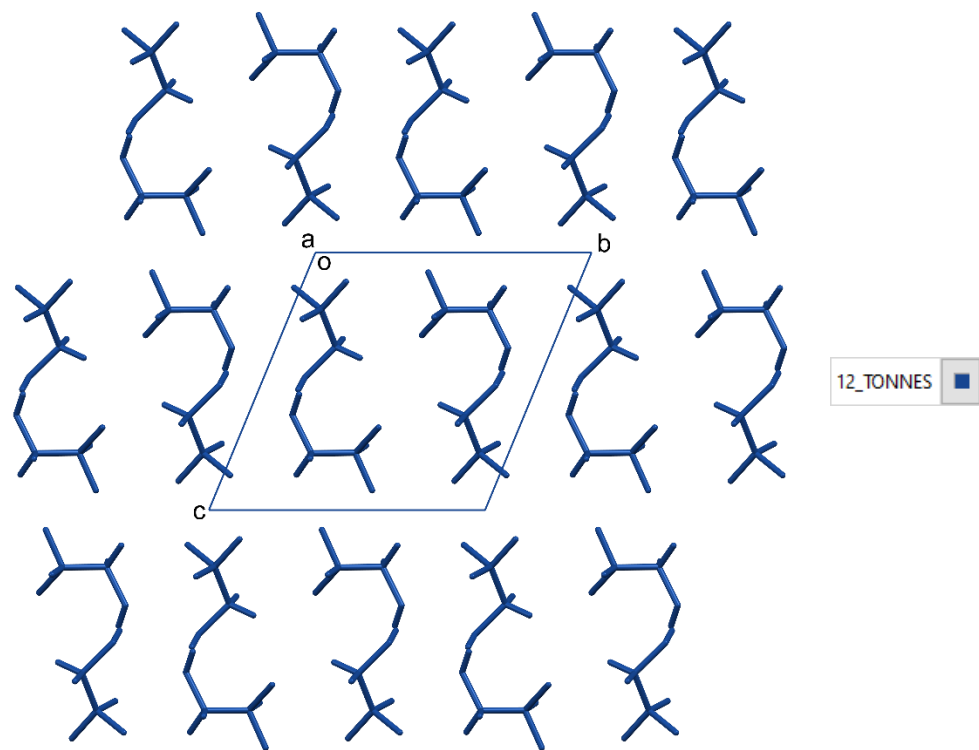

(a)

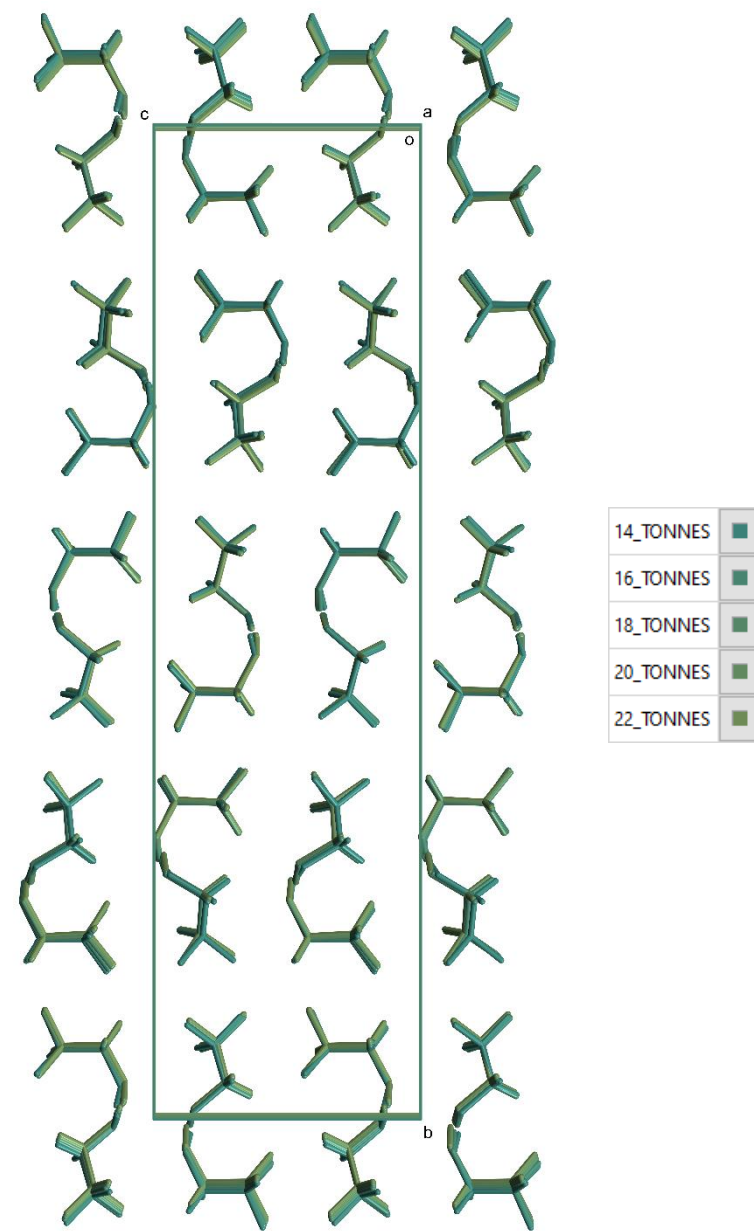

(b)

**Figure S2.1:** Packing of the TFE structures refined from the neutron powder-diffraction data from PEARL at 295 K (a) Form 2 at 0.44(7) GPa and (b) overlay of Form 3 at pressures from 0.83(5) GPa to 1.46(3) GPa. Form 3 progression from 0.83 GPa (14T, cyan) to 1.46 GPa (22T, green) is shown by successively greener shading.

**Table S2.2b:** Atomic positions for the structures refined from the high-pressure neutron powder-diffraction studies at 295 K on PEARL (Form 4)

| Form 4 | 20T      | 22T      | 24T      | 26T      | 28T      | 30T      | 36T      | 40T      | 44T      | 48T      | 52T      | 56T      | 60T      |         |
|--------|----------|----------|----------|----------|----------|----------|----------|----------|----------|----------|----------|----------|----------|---------|
| Atom   | 1.40 GPa | 1.46 GPa | 1.60 GPa | 1.89 GPa | 2.19 GPa | 2.71 GPa | 2.91 GPa | 3.30 GPa | 3.73 GPa | 4.36 GPa | 4.88 GPa | 5.42 GPa | 6.14 GPa |         |
| C1     | x        | 0.80267  | 0.80267  | 0.79891  | 0.80737  | 0.81699  | 0.81955  | 0.81765  | 0.81621  | 0.81333  | 0.81321  | 0.80577  | 0.80154  | 0.77687 |
|        | y        | 0.30889  | 0.30889  | 0.30866  | 0.30805  | 0.30851  | 0.30890  | 0.30916  | 0.30875  | 0.30917  | 0.30865  | 0.30725  | 0.30736  | 0.30714 |
|        | z        | 0.49603  | 0.49603  | 0.49530  | 0.49996  | 0.50416  | 0.50640  | 0.50493  | 0.49079  | 0.49293  | 0.49547  | 0.49426  | 0.49635  | 0.49469 |
| D1A    |          | 1.00329  | 1.00329  | 1.00043  | 1.01003  | 1.01872  | 1.02244  | 1.02169  | 1.02632  | 1.02193  | 1.02180  | 1.01535  | 1.00978  | 0.99459 |
|        |          | 0.31767  | 0.31767  | 0.31692  | 0.31626  | 0.31811  | 0.31868  | 0.31891  | 0.31424  | 0.31490  | 0.31470  | 0.31338  | 0.31501  | 0.31261 |
|        |          | 0.52505  | 0.52505  | 0.52284  | 0.52698  | 0.53413  | 0.53651  | 0.53562  | 0.51451  | 0.52403  | 0.52899  | 0.52839  | 0.53495  | 0.51562 |
| D1B    |          | 0.71128  | 0.71128  | 0.70849  | 0.71753  | 0.72521  | 0.72776  | 0.72493  | 0.72623  | 0.71521  | 0.71315  | 0.70494  | 0.69709  | 0.69040 |
|        |          | 0.27837  | 0.27837  | 0.27853  | 0.27762  | 0.27747  | 0.27750  | 0.27736  | 0.27731  | 0.27560  | 0.27379  | 0.27189  | 0.27181  | 0.27311 |
|        |          | 0.57523  | 0.57523  | 0.57537  | 0.58036  | 0.58370  | 0.58623  | 0.58466  | 0.57283  | 0.56991  | 0.57038  | 0.56887  | 0.56985  | 0.57766 |
| O1     |          | 0.78755  | 0.78755  | 0.77895  | 0.78561  | 0.80540  | 0.80801  | 0.80659  | 0.77659  | 0.79114  | 0.79721  | 0.79077  | 0.80016  | 0.72634 |
|        |          | 0.26356  | 0.26356  | 0.26314  | 0.26276  | 0.26278  | 0.26315  | 0.26360  | 0.26551  | 0.26863  | 0.26945  | 0.26826  | 0.26695  | 0.26561 |
|        |          | 0.35812  | 0.35812  | 0.35769  | 0.36149  | 0.36522  | 0.36648  | 0.36383  | 0.34687  | 0.34431  | 0.34473  | 0.34253  | 0.34535  | 0.34560 |
| D1     |          | 0.63633  | 0.63633  | 0.62724  | 0.62860  | 0.64875  | 0.65078  | 0.64841  | 0.62898  | 0.64430  | 0.64719  | 0.63991  | 0.65487  | 0.58288 |
|        |          | 0.24185  | 0.24185  | 0.24106  | 0.24563  | 0.25197  | 0.25367  | 0.25369  | 0.23666  | 0.24019  | 0.24300  | 0.24183  | 0.23772  | 0.23225 |
|        |          | 0.33012  | 0.33012  | 0.33176  | 0.33017  | 0.32297  | 0.32231  | 0.31968  | 0.33089  | 0.32072  | 0.31642  | 0.31337  | 0.31514  | 0.33293 |
| C2     |          | 0.66535  | 0.66535  | 0.66386  | 0.67164  | 0.67500  | 0.67581  | 0.67314  | 0.68841  | 0.68211  | 0.67854  | 0.66975  | 0.65883  | 0.64393 |
|        |          | 0.39039  | 0.39039  | 0.39050  | 0.39021  | 0.39001  | 0.39070  | 0.39145  | 0.39428  | 0.39480  | 0.39441  | 0.39347  | 0.39311  | 0.39491 |
|        |          | 0.47552  | 0.47552  | 0.47533  | 0.48115  | 0.48281  | 0.48542  | 0.48449  | 0.47995  | 0.48400  | 0.48838  | 0.48777  | 0.48427  | 0.49191 |
| F1     |          | 0.40732  | 0.40732  | 0.40459  | 0.41033  | 0.41330  | 0.41154  | 0.40589  | 0.41265  | 0.40474  | 0.40062  | 0.39060  | 0.37952  | 0.35306 |
|        |          | 0.38368  | 0.38368  | 0.38444  | 0.38428  | 0.38212  | 0.38257  | 0.38338  | 0.39221  | 0.39234  | 0.39160  | 0.39065  | 0.38797  | 0.39301 |
|        |          | 0.41019  | 0.41019  | 0.41132  | 0.41804  | 0.41911  | 0.42267  | 0.42311  | 0.42604  | 0.42961  | 0.43222  | 0.43069  | 0.42459  | 0.44878 |
| F2     |          | 0.81283  | 0.81283  | 0.81137  | 0.81840  | 0.81954  | 0.81917  | 0.81556  | 0.83284  | 0.82579  | 0.82291  | 0.81524  | 0.80439  | 0.77652 |
|        |          | 0.44069  | 0.44069  | 0.44035  | 0.44037  | 0.44054  | 0.44149  | 0.44235  | 0.44445  | 0.44622  | 0.44733  | 0.44710  | 0.44653  | 0.44740 |
|        |          | 0.38817  | 0.38817  | 0.38709  | 0.39225  | 0.39250  | 0.39375  | 0.39129  | 0.38491  | 0.38956  | 0.39600  | 0.39601  | 0.39100  | 0.39045 |
| F3     |          | 0.59100  | 0.59100  | 0.59298  | 0.60243  | 0.60149  | 0.60367  | 0.60355  | 0.64193  | 0.63401  | 0.62650  | 0.61620  | 0.59817  | 0.61572 |
|        |          | 0.43574  | 0.43574  | 0.43613  | 0.43574  | 0.43613  | 0.43708  | 0.43823  | 0.44027  | 0.44002  | 0.43862  | 0.43751  | 0.43878  | 0.44094 |
|        |          | 0.59085  | 0.59085  | 0.59100  | 0.59791  | 0.59871  | 0.60221  | 0.60220  | 0.60353  | 0.60947  | 0.61532  | 0.61553  | 0.60960  | 0.62133 |
| C3     |          | 0.21611  | 0.21611  | 0.21329  | 0.21584  | 0.22068  | 0.21842  | 0.21937  | 0.19734  | 0.20277  | 0.20720  | 0.20473  | 0.20786  | 0.24535 |
|        |          | 0.11053  | 0.11053  | 0.11114  | 0.10941  | 0.10813  | 0.10761  | 0.10595  | 0.10772  | 0.10595  | 0.10502  | 0.10430  | 0.10390  | 0.09623 |
|        |          | 0.38243  | 0.38243  | 0.38159  | 0.37949  | 0.37960  | 0.37803  | 0.37876  | 0.37895  | 0.37382  | 0.37186  | 0.37226  | 0.37313  | 0.35373 |
| D3A    |          | 0.32444  | 0.32444  | 0.32063  | 0.32560  | 0.32725  | 0.32222  | 0.32497  | 0.29696  | 0.30971  | 0.31178  | 0.30569  | 0.30482  | 0.36993 |
|        |          | 0.06665  | 0.06665  | 0.06741  | 0.06513  | 0.06223  | 0.06059  | 0.05897  | 0.06070  | 0.05942  | 0.05803  | 0.05683  | 0.05541  | 0.05437 |
|        |          | 0.33348  | 0.33348  | 0.33154  | 0.33185  | 0.33405  | 0.33311  | 0.33341  | 0.32853  | 0.32495  | 0.32173  | 0.32011  | 0.32079  | 0.29795 |
| D3B    |          | 0.01698  | 0.01698  | 0.01430  | 0.01585  | 0.01859  | 0.01448  | 0.01440  | -0.00922 | -0.00412 | -0.00116 | -0.00524 | -0.00478 | 0.04306 |
|        |          | 0.09839  | 0.09839  | 0.09867  | 0.09747  | 0.09871  | 0.09941  | 0.09670  | 0.09803  | 0.09472  | 0.09427  | 0.09425  | 0.09607  | 0.07526 |
|        |          | 0.37508  | 0.37508  | 0.37644  | 0.37030  | 0.36650  | 0.36463  | 0.36733  | 0.37665  | 0.36834  | 0.36797  | 0.37059  | 0.36927  | 0.35804 |
| O2     |          | 0.26641  | 0.26641  | 0.25918  | 0.26997  | 0.29150  | 0.29569  | 0.29028  | 0.25394  | 0.25768  | 0.26229  | 0.25999  | 0.27579  | 0.24364 |
|        |          | 0.18446  | 0.18446  | 0.18510  | 0.18328  | 0.18135  | 0.18033  | 0.17904  | 0.18136  | 0.18023  | 0.17965  | 0.17948  | 0.17922  | 0.17394 |
|        |          | 0.30439  | 0.30439  | 0.30274  | 0.30099  | 0.30186  | 0.29893  | 0.29734  | 0.29396  | 0.28883  | 0.28642  | 0.28681  | 0.28960  | 0.26682 |

|    |         |         |         |         |         |         |         |         |         |         |         |         |         |
|----|---------|---------|---------|---------|---------|---------|---------|---------|---------|---------|---------|---------|---------|
| D2 | 0.14297 | 0.14297 | 0.13469 | 0.15367 | 0.18260 | 0.18881 | 0.18211 | 0.11669 | 0.12008 | 0.12607 | 0.12531 | 0.14396 | 0.11716 |
|    | 0.22044 | 0.22044 | 0.22078 | 0.22137 | 0.22150 | 0.22130 | 0.22004 | 0.20982 | 0.21167 | 0.21308 | 0.21449 | 0.21525 | 0.21119 |
|    | 0.30101 | 0.30101 | 0.30026 | 0.30370 | 0.30443 | 0.30028 | 0.30042 | 0.25782 | 0.26236 | 0.26588 | 0.27098 | 0.27089 | 0.28524 |
| C4 | 0.31163 | 0.31163 | 0.31467 | 0.30661 | 0.30191 | 0.29981 | 0.30641 | 0.31048 | 0.30747 | 0.31743 | 0.32256 | 0.32246 | 0.37625 |
|    | 0.11629 | 0.11629 | 0.11720 | 0.11554 | 0.11344 | 0.11318 | 0.11268 | 0.11462 | 0.11382 | 0.11248 | 0.11080 | 0.10833 | 0.10869 |
|    | 0.54698 | 0.54698 | 0.54516 | 0.54538 | 0.54768 | 0.54705 | 0.54782 | 0.54512 | 0.54258 | 0.54049 | 0.54047 | 0.54298 | 0.51957 |
| F4 | 0.22633 | 0.22633 | 0.24343 | 0.22363 | 0.19828 | 0.19564 | 0.20161 | 0.25222 | 0.24202 | 0.25119 | 0.25470 | 0.23015 | 0.32000 |
|    | 0.05298 | 0.05298 | 0.05225 | 0.05132 | 0.05121 | 0.05072 | 0.05097 | 0.04711 | 0.04679 | 0.04529 | 0.04341 | 0.04319 | 0.04305 |
|    | 0.63013 | 0.63013 | 0.62805 | 0.62778 | 0.62928 | 0.62926 | 0.63316 | 0.63050 | 0.62909 | 0.62770 | 0.62822 | 0.63091 | 0.61643 |
| F5 | 0.59289 | 0.59289 | 0.59543 | 0.58839 | 0.58458 | 0.58413 | 0.59297 | 0.59801 | 0.59679 | 0.60887 | 0.61636 | 0.61940 | 0.67297 |
|    | 0.11964 | 0.11964 | 0.12436 | 0.12075 | 0.11332 | 0.11317 | 0.11187 | 0.12543 | 0.12402 | 0.12169 | 0.11837 | 0.10826 | 0.11827 |
|    | 0.56199 | 0.56199 | 0.55679 | 0.56289 | 0.57093 | 0.57069 | 0.56927 | 0.55261 | 0.55477 | 0.55048 | 0.54735 | 0.55315 | 0.51971 |
| F6 | 0.26248 | 0.26248 | 0.25884 | 0.24971 | 0.25369 | 0.25089 | 0.26230 | 0.24933 | 0.24260 | 0.25751 | 0.27040 | 0.28749 | 0.32466 |
|    | 0.18005 | 0.18005 | 0.17965 | 0.17898 | 0.17855 | 0.17870 | 0.17941 | 0.17741 | 0.17770 | 0.17687 | 0.17572 | 0.17521 | 0.17672 |
|    | 0.63239 | 0.63239 | 0.63259 | 0.63090 | 0.63153 | 0.63100 | 0.63069 | 0.63639 | 0.63169 | 0.63061 | 0.63218 | 0.63358 | 0.60564 |

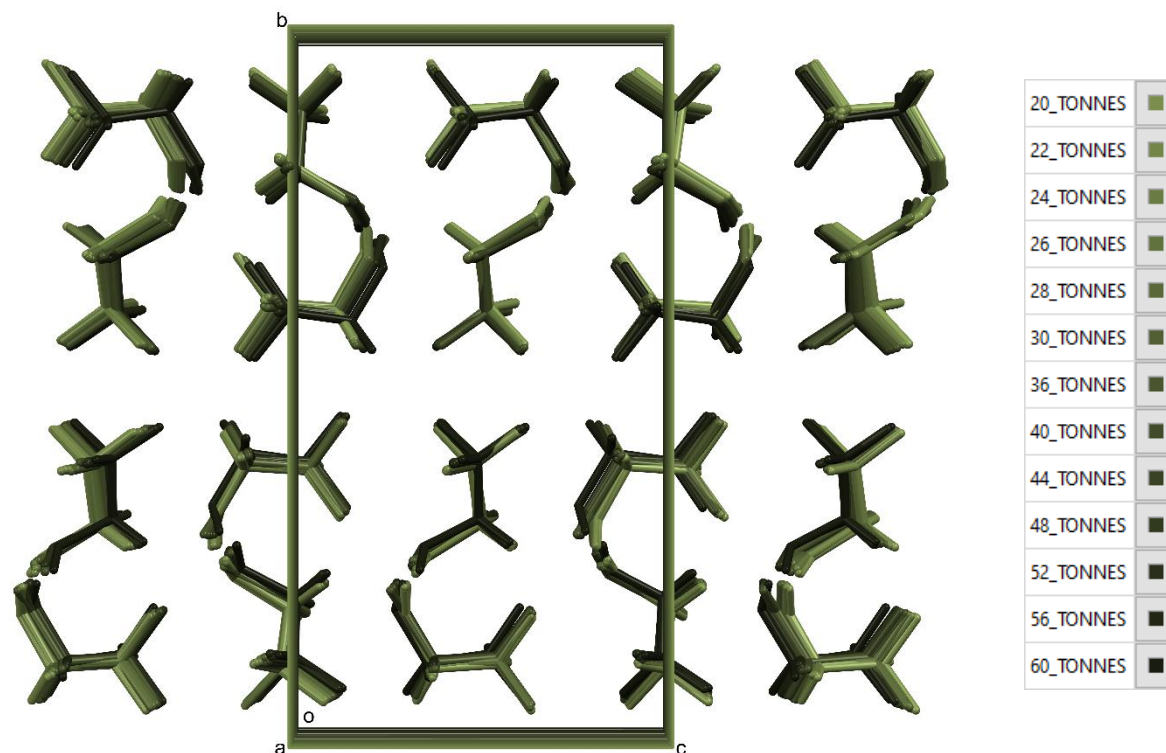

**Figure S2.2:** Packing of the TFE structures refined from the neutron powder-diffraction data from PEARL at 295 K showing an overlay of Form 4 at pressures from 1.40(4) GPa to 6.14(21) GPa. Progression from 1.40 GPa (20T, green) to 6.14 GPa (60T, black) is show by successively darker shading.

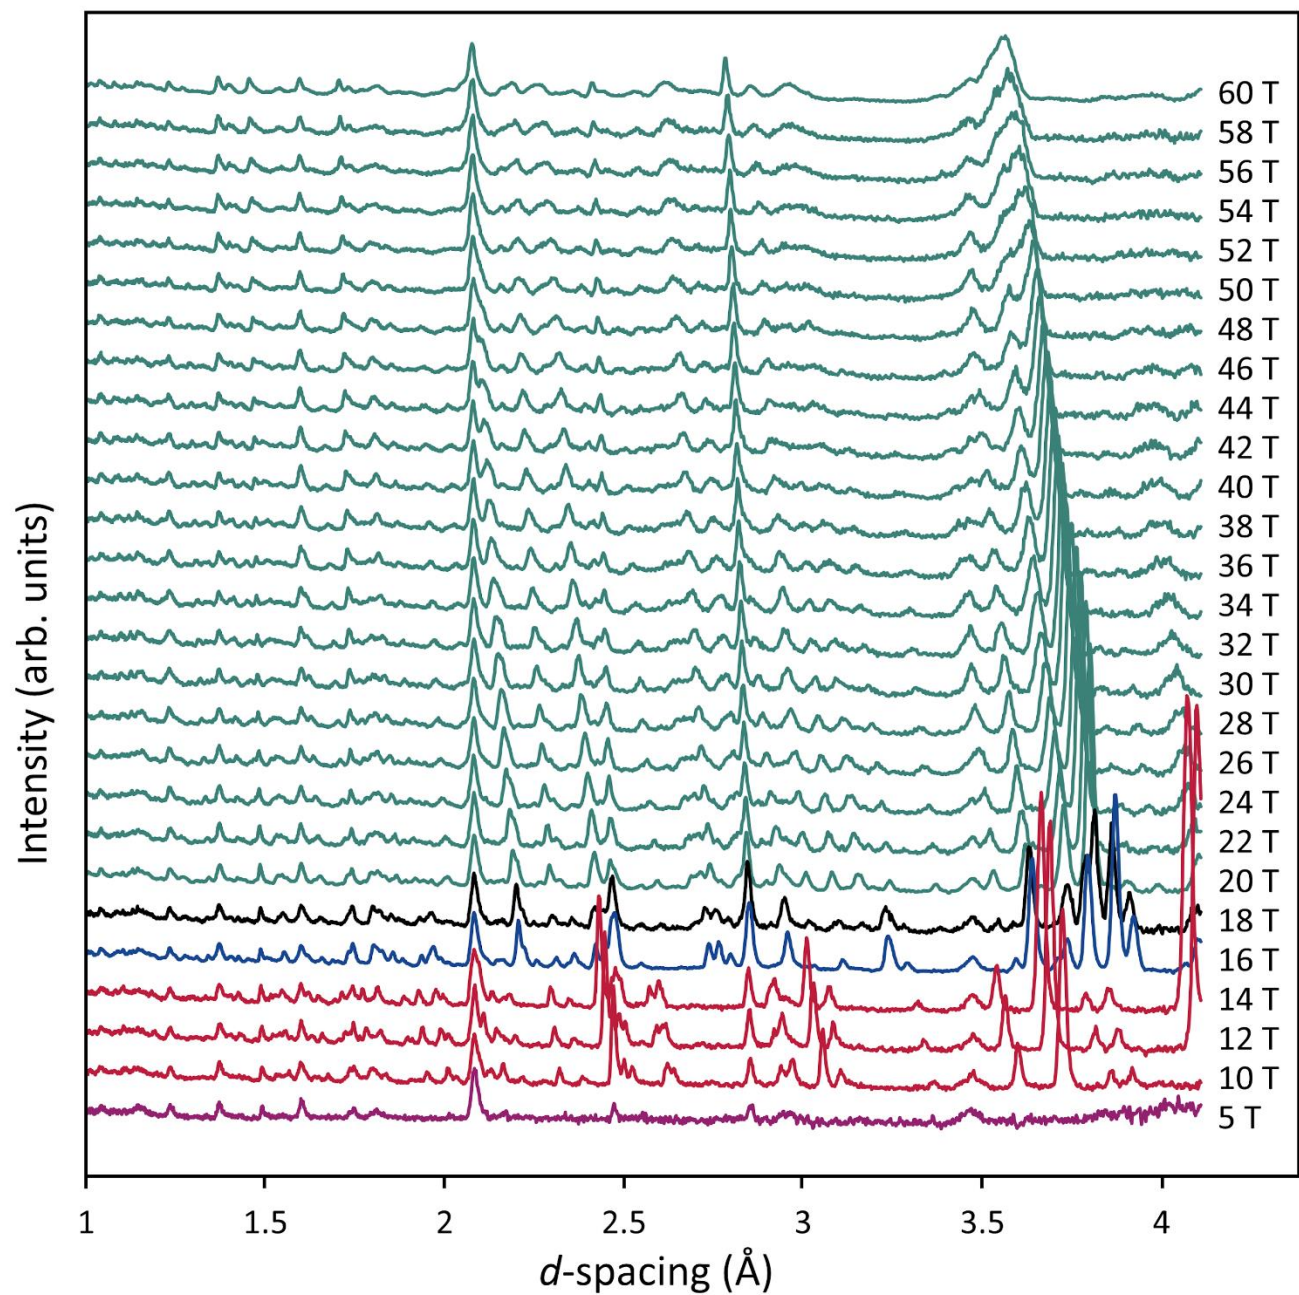

**Figure S2.3:** Neutron powder-diffraction patterns of TFE obtained from PEARL, collected at 245 K, shown with increasing pressure (liquid – purple; Form 1 – red; Form 2 – blue; Form 3 – cyan; mixed phase of Forms 2 and 3 – black).

**Table S2.3:** Crystallographic data for the high-pressure neutron powder studies of TFE at 245 K on PEARL

| Load (T) | Pressure (GPa) * | wR      | Form | Space Group                        | a (Å)      | b (Å)      | c (Å)      | $\alpha$ (°) | $\beta$ (°) | $\gamma$ (°) | V (Å <sup>3</sup> ) | Density (g/cm <sup>3</sup> ) | Z / Z' | VpM (Å <sup>3</sup> ) ** |
|----------|------------------|---------|------|------------------------------------|------------|------------|------------|--------------|-------------|--------------|---------------------|------------------------------|--------|--------------------------|
| 10       | 0.003(37) ^      | 0.08343 | 1    | <i>Pca</i> 2 <sub>1</sub>          | 8.5113(8)  | 9.9903(11) | 9.0888(8)  | 90           | 90          | 90           | 772.83(9)           | 1.7887                       | 8 / 2  | 96.60(9)                 |
| 12       | 0.25(3)          | 0.08378 | 1    | <i>Pca</i> 2 <sub>1</sub>          | 8.4210(6)  | 9.9339(9)  | 8.9988(7)  | 90           | 90          | 90           | 752.78(7)           | 1.8363                       | 8 / 2  | 94.10(7)                 |
| 14       | 0.48(2)          | 0.08115 | 1    | <i>Pca</i> 2 <sub>1</sub>          | 8.3612(6)  | 9.8952(9)  | 8.9318(5)  | 90           | 90          | 90           | 738.98(6)           | 1.8706                       | 8 / 2  | 92.37(6)                 |
| 16       | 0.52(2)          | 0.05911 | 2    | <i>P</i> -1                        | 4.8936(7)  | 8.876(4)   | 9.198(5)   | 111.615(10)  | 102.907(5)  | 91.077(3)    | 359.80(3)           | 1.9025                       | 4 / 2  | 89.95(3)                 |
| 18       | 0.46(3)          | 0.08545 | 2    | <i>P</i> -1                        | 4.8812(17) | 8.851(8)   | 9.182(11)  | 111.67(2)    | 102.903(11) | 91.117(7)    | 357.07(6)           | 1.9170                       | 4 / 2  | 89.27(6)                 |
| 18       | 0.46(3)          | 0.08545 | 3    | <i>P</i> 2 <sub>1</sub> / <i>c</i> | 4.8399(10) | 32.887(8)  | 8.856(2)   | 90           | 91.667(17)  | 90           | 1409.1(4)           | 1.9431                       | 16 / 4 | 88.1(4)                  |
| 20       | 0.72(2)          | 0.05546 | 3    | <i>P</i> 2 <sub>1</sub> / <i>c</i> | 4.8238(3)  | 32.824(3)  | 8.8291(7)  | 90           | 91.649(5)   | 90           | 1397.41(11)         | 1.9594                       | 16 / 4 | 87.34(11)                |
| 22       | 0.82(2)          | 0.06978 | 3    | <i>P</i> 2 <sub>1</sub> / <i>c</i> | 4.8086(4)  | 32.735(3)  | 8.7939(8)  | 90           | 91.667(7)   | 90           | 1383.65(14)         | 1.9789                       | 16 / 4 | 86.48(14)                |
| 24       | 0.98(2)          | 0.06000 | 3    | <i>P</i> 2 <sub>1</sub> / <i>c</i> | 4.7899(4)  | 32.612(3)  | 8.7541(7)  | 90           | 91.646(6)   | 90           | 1366.91(12)         | 2.0031                       | 16 / 4 | 85.43(12)                |
| 26       | 1.10(2)          | 0.06299 | 3    | <i>P</i> 2 <sub>1</sub> / <i>c</i> | 4.7740(4)  | 32.516(3)  | 8.7218(8)  | 90           | 91.652(7)   | 90           | 1353.36(13)         | 2.0232                       | 16 / 4 | 84.59(13)                |
| 28       | 1.28(2)          | 0.06344 | 3    | <i>P</i> 2 <sub>1</sub> / <i>c</i> | 4.7561(4)  | 32.419(3)  | 8.6874(8)  | 90           | 91.636(7)   | 90           | 1338.98(14)         | 2.0449                       | 16 / 4 | 83.69(14)                |
| 30       | 1.44(2)          | 0.06836 | 3    | <i>P</i> 2 <sub>1</sub> / <i>c</i> | 4.7368(4)  | 32.321(3)  | 8.6503(10) | 90           | 91.636(8)   | 90           | 1323.79(15)         | 2.0684                       | 16 / 4 | 82.74(15)                |
| 32       | 1.57(2)          | 0.06846 | 3    | <i>P</i> 2 <sub>1</sub> / <i>c</i> | 4.7240(5)  | 32.245(4)  | 8.6265(10) | 90           | 91.640(8)   | 90           | 1313.49(16)         | 2.0846                       | 16 / 4 | 82.09(16)                |
| 34       | 1.72(2)          | 0.06841 | 3    | <i>P</i> 2 <sub>1</sub> / <i>c</i> | 4.7073(5)  | 32.165(4)  | 8.5957(11) | 90           | 91.638(9)   | 90           | 1300.94(16)         | 2.1047                       | 16 / 4 | 81.31(16)                |
| 36       | 1.86(2)          | 0.06815 | 3    | <i>P</i> 2 <sub>1</sub> / <i>c</i> | 4.6916(5)  | 32.098(4)  | 8.5689(12) | 90           | 91.645(9)   | 90           | 1289.86(17)         | 2.1228                       | 16 / 4 | 80.62(17)                |
| 38       | 2.01(2)          | 0.06796 | 3    | <i>P</i> 2 <sub>1</sub> / <i>c</i> | 4.6756(5)  | 32.039(4)  | 8.5426(13) | 90           | 91.663(10)  | 90           | 1279.18(18)         | 2.1405                       | 16 / 4 | 79.95(18)                |
| 40       | 2.21(2)          | 0.06887 | 3    | <i>P</i> 2 <sub>1</sub> / <i>c</i> | 4.6612(6)  | 31.966(4)  | 8.5147(13) | 90           | 91.660(10)  | 90           | 1268.13(19)         | 2.1591                       | 16 / 4 | 79.26(19)                |
| 42       | 2.36(2)          | 0.06804 | 3    | <i>P</i> 2 <sub>1</sub> / <i>c</i> | 4.6464(6)  | 31.910(4)  | 8.4922(14) | 90           | 91.659(11)  | 90           | 1258.6(2)           | 2.1755                       | 16 / 4 | 78.7(2)                  |
| 44       | 2.55(3)          | 0.06881 | 3    | <i>P</i> 2 <sub>1</sub> / <i>c</i> | 4.6322(7)  | 31.851(5)  | 8.4693(15) | 90           | 91.660(12)  | 90           | 1249.0(2)           | 2.1922                       | 16 / 4 | 78.1(2)                  |
| 46       | 2.72(3)          | 0.06855 | 3    | <i>P</i> 2 <sub>1</sub> / <i>c</i> | 4.6179(7)  | 31.793(5)  | 8.4499(16) | 90           | 91.641(13)  | 90           | 1240.1(2)           | 2.2080                       | 16 / 4 | 77.5(2)                  |
| 48       | 2.90(3)          | 0.06610 | 3    | <i>P</i> 2 <sub>1</sub> / <i>c</i> | 4.6025(8)  | 31.748(5)  | 8.4346(17) | 90           | 91.589(14)  | 90           | 1232.0(3)           | 2.2225                       | 16 / 4 | 77.0(3)                  |
| 50 ^^    | 3.09(3)          | 0.07031 | 3    | <i>P</i> 2 <sub>1</sub> / <i>c</i> | 4.5860(10) | 31.720(7)  | 8.412(2)   | 90           | 91.506(17)  | 90           | 1223.2(3)           | 2.2385                       | 16 / 4 | 76.5(3)                  |

\* Pressure calculated using the refined value for the Pb  $\alpha$ -axis<sup>1</sup>

\*\* VpM: volume per molecule calculated by dividing the unit cell volume by Z and used for Figure 9 of the main text (volume per formula unit)

^ The pressure calculated within the measuring uncertainty of the Pb pressure marker; the fact the sample has crystallised clearly indicates the pressure within the cell is greater than atmospheric, when it was still liquid

^^ Although data was collected up to 60T, the refinements beyond 50T (3.09 GPa) are not included due to the significant pressure broadening which began to be observed in the powder-diffraction patterns at this point



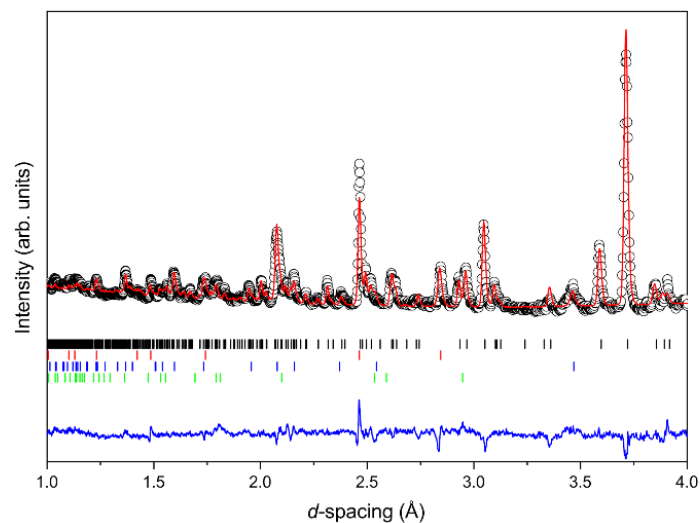

(a)

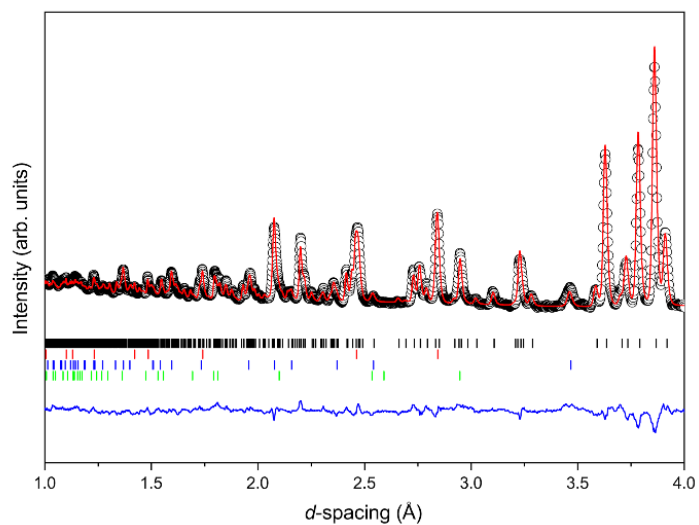

(b)

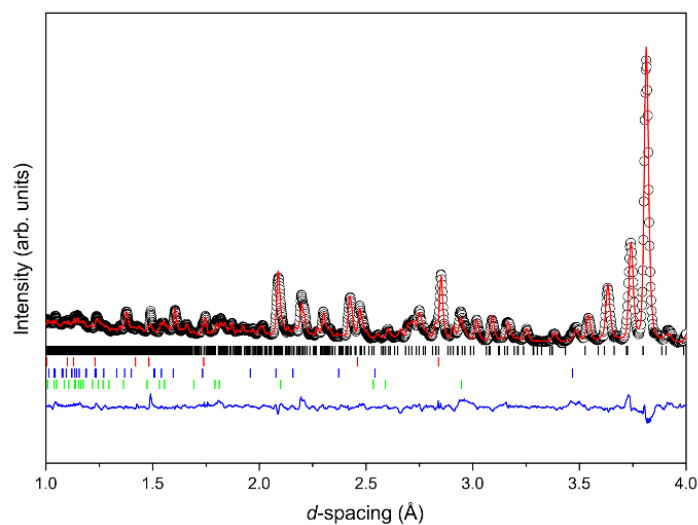

(c)

**Figure S2.4:** Selected Rietveld refinements of the neutron powder-diffraction PEARL data collected on TFE at 245 K for (a) Form 1 [0.003(37) GPa], (b) Form 2 [0.52(2) GPa] and (c) Form 3 [0.72(2) GPa] – representative refinements are shown for the patterns recorded at the lowest pressure exhibiting a single phase (black circle – observed data; red line – calculated patterns; black tick marks – TFE; green tick marks –  $\text{Al}_2\text{O}_3$ ; red tick marks – Pb; blue tick marks –  $\text{ZrO}_2$ ; blue line – difference between observed and calculated data)

**Table S2.4a:** Atomic positions for the structures refined from the high-pressure neutron powder-diffraction studies at 245 K on PEARL (Forms 1 and 2)

| Form 1<br>Atom | 10T<br>0.003 GPa | 12T<br>0.25 GPa | 14T<br>0.48 GPa | Form 2<br>Atom | 16T<br>0.52 GPa | 18T<br>0.46 GPa |
|----------------|------------------|-----------------|-----------------|----------------|-----------------|-----------------|
| C1             | x                | 0.15097         | 0.14940         | C1             | x               | 0.98354         |
|                | y                | 0.17069         | 0.16435         |                | y               | 0.22262         |
|                | z                | 0.44780         | 0.44537         |                | z               | 0.36694         |
| D1A            |                  | 0.08645         | 0.08086         | D1A            |                 | 1.16582         |
|                |                  | 0.16824         | 0.15346         |                |                 | 0.24064         |
|                |                  | 0.53365         | 0.52898         |                |                 | 0.34595         |
| D1B            |                  | 0.09216         | 0.09807         | D1B            |                 | 0.90794         |
|                |                  | 0.13838         | 0.13004         |                |                 | 0.32390         |
|                |                  | 0.36271         | 0.35578         |                |                 | 0.40744         |
| O1             |                  | 0.19606         | 0.18030         | O1             |                 | 1.02340         |
|                |                  | 0.30276         | 0.30114         |                |                 | 0.15338         |
|                |                  | 0.42116         | 0.42543         |                |                 | 0.48282         |
| D1             |                  | 0.21394         | 0.20541         | D1             |                 | 0.88820         |
|                |                  | 0.35290         | 0.34758         |                |                 | 0.13246         |
|                |                  | 0.49070         | 0.49710         |                |                 | 0.51396         |
| C2             |                  | 0.28941         | 0.29791         | C2             |                 | 0.79136         |
|                |                  | 0.08390         | 0.08851         |                |                 | 0.11255         |
|                |                  | 0.46803         | 0.46861         |                |                 | 0.21431         |
| F1             |                  | 0.27905         | 0.30108         | F1             |                 | 0.89719         |
|                |                  | -0.03975        | -0.03120        |                |                 | -0.02381        |
|                |                  | 0.50833         | 0.52447         |                |                 | 0.14557         |
| F2             |                  | 0.38080         | 0.38404         | F2             |                 | 0.54711         |
|                |                  | 0.08095         | 0.07918         |                |                 | 0.07176         |
|                |                  | 0.35093         | 0.34666         |                |                 | 0.23652         |
| F3             |                  | 0.37657         | 0.38788         | F3             |                 | 0.68624         |
|                |                  | 0.12374         | 0.14519         |                |                 | 0.15782         |
|                |                  | 0.58023         | 0.57155         |                |                 | 0.09711         |
| C3             |                  | 0.84720         | 0.84535         | C3             |                 | 0.61516         |
|                |                  | 0.43935         | 0.43958         |                |                 | 0.29484         |
|                |                  | 0.20264         | 0.19982         |                |                 | 0.77457         |
| D3A            |                  | 0.91872         | 0.91656         | D3A            |                 | 0.76677         |
|                |                  | 0.40629         | 0.40387         |                |                 | 0.27296         |
|                |                  | 0.13039         | 0.12732         |                |                 | 0.85078         |
| D3B            |                  | 0.89987         | 0.89940         | D3B            |                 | 0.44170         |
|                |                  | 0.44736         | 0.44897         |                |                 | 0.29283         |
|                |                  | 0.29765         | 0.29522         |                |                 | 0.80529         |
| O2             |                  | 0.79543         | 0.79497         | O2             |                 | 0.58692         |
|                |                  | 0.56606         | 0.56672         |                |                 | 0.17336         |
|                |                  | 0.16003         | 0.15379         |                |                 | 0.62186         |

|    |                               |                               |                               |    |                               |                               |
|----|-------------------------------|-------------------------------|-------------------------------|----|-------------------------------|-------------------------------|
| D2 | 0.71634<br>0.59791<br>0.19794 | 0.72524<br>0.60589<br>0.20058 | 0.71104<br>0.59198<br>0.22389 | D2 | 0.43222<br>0.14702<br>0.55686 | 0.41602<br>0.14947<br>0.55576 |
| C4 | 0.71396<br>0.34624<br>0.21928 | 0.70910<br>0.34807<br>0.21980 | 0.72123<br>0.34044<br>0.22998 | C4 | 0.68977<br>0.45681<br>0.77509 | 0.69175<br>0.46091<br>0.77262 |
| F4 | 0.75418<br>0.23840<br>0.29482 | 0.75220<br>0.23404<br>0.28403 | 0.77317<br>0.21640<br>0.25591 | F4 | 0.70875<br>0.57370<br>0.91794 | 0.70773<br>0.57846<br>0.91525 |
| F5 | 0.65782<br>0.30534<br>0.09174 | 0.63976<br>0.31679<br>0.09303 | 0.63734<br>0.33683<br>0.10502 | F5 | 0.50403<br>0.49285<br>0.66818 | 0.51092<br>0.49764<br>0.66382 |
| F6 | 0.59071<br>0.37442<br>0.29605 | 0.59278<br>0.37395<br>0.30884 | 0.61490<br>0.34163<br>0.33482 | F6 | 0.93128<br>0.49988<br>0.75904 | 0.93699<br>0.50290<br>0.75942 |

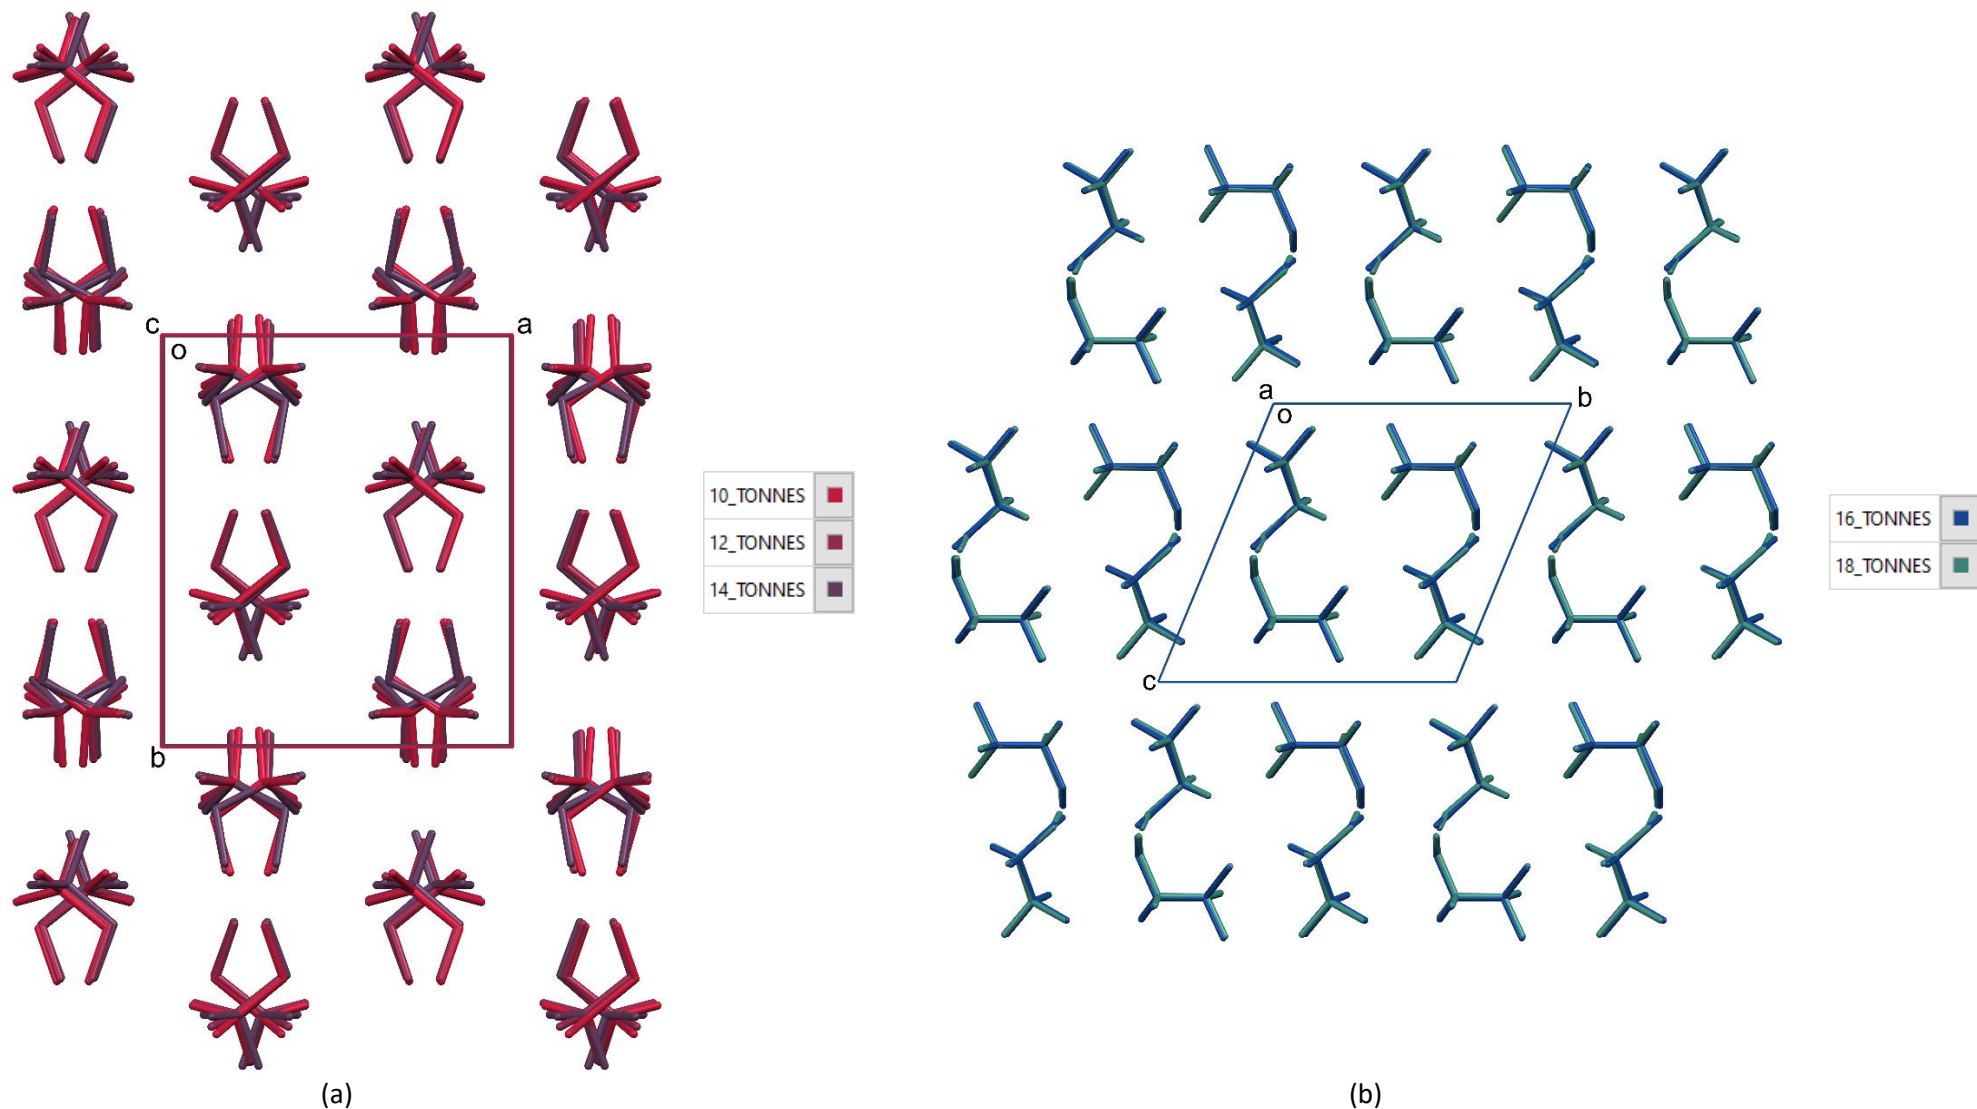

**Figure S2.5:** Packing of the TFE structures refined from the neutron powder-diffraction data from PEARL at 245 K (a) overlay of Form 1 at pressures from 0.003(37) GPa to 0.48(2) GPa and (b) overlay of Form 2 at pressures from 0.52(2) GPa to 0.46(3) GPa. Form 1 progression from 0.003 GPa (10T, red) to 0.48 GPa (14T, purple) is shown by successively bluer shading; Form 2 progression from 0.52 GPa (16T, blue) to 0.48 GPa (18T, cyan) is shown by successively greener shading.



|     |                                |                                |                                |                                |                                |                                |                                |                                |                                |                                |                                |                                |                                |                                |                                |                                |                                |
|-----|--------------------------------|--------------------------------|--------------------------------|--------------------------------|--------------------------------|--------------------------------|--------------------------------|--------------------------------|--------------------------------|--------------------------------|--------------------------------|--------------------------------|--------------------------------|--------------------------------|--------------------------------|--------------------------------|--------------------------------|
| D2  | 0.08179<br>0.48693<br>0.37632  | 0.08179<br>0.48693<br>0.37632  | 0.07286<br>0.48887<br>0.37476  | 0.07531<br>0.48799<br>0.37895  | 0.07484<br>0.48838<br>0.38642  | 0.08391<br>0.48867<br>0.39468  | 0.09386<br>0.48929<br>0.39739  | 0.08410<br>0.48901<br>0.40321  | 0.09637<br>0.48902<br>0.40999  | 0.11807<br>0.48980<br>0.41319  | 0.11285<br>0.48907<br>0.41698  | 0.11836<br>0.48884<br>0.40914  | 0.13104<br>0.48940<br>0.40448  | 0.14902<br>0.49057<br>0.40128  | 0.11941<br>0.49017<br>0.39440  | 0.11578<br>0.48967<br>0.39046  | 0.11575<br>0.48968<br>0.39041  |
| C4  | -0.04209<br>0.42897<br>0.15297 | -0.04209<br>0.42897<br>0.15297 | -0.02853<br>0.42932<br>0.15219 | -0.02007<br>0.42879<br>0.15578 | -0.02151<br>0.42985<br>0.15881 | -0.02171<br>0.43039<br>0.15821 | -0.02916<br>0.43081<br>0.15805 | -0.02986<br>0.43135<br>0.15785 | -0.03662<br>0.43280<br>0.15467 | -0.04510<br>0.43597<br>0.15511 | -0.07620<br>0.43538<br>0.15811 | -0.07420<br>0.43444<br>0.15681 | -0.06943<br>0.43368<br>0.15763 | -0.06439<br>0.43342<br>0.15931 | -0.06422<br>0.43129<br>0.16361 | -0.05844<br>0.43165<br>0.16542 | -0.05842<br>0.43165<br>0.16546 |
| F4  | 0.03318<br>0.39441<br>0.08913  | 0.03318<br>0.39441<br>0.08913  | 0.04928<br>0.39432<br>0.09154  | 0.07260<br>0.39513<br>0.08992  | 0.07569<br>0.39688<br>0.08928  | 0.10022<br>0.39912<br>0.08865  | 0.09045<br>0.39926<br>0.08785  | 0.09265<br>0.40025<br>0.08565  | 0.08320<br>0.40123<br>0.08301  | 0.07475<br>0.40472<br>0.08074  | -0.00474<br>0.40036<br>0.08726 | -0.03159<br>0.39839<br>0.08495 | -0.01921<br>0.39774<br>0.08595 | -0.00378<br>0.39764<br>0.08833 | -0.01067<br>0.39506<br>0.09340 | -0.01806<br>0.39550<br>0.09131 | -0.01801<br>0.39549<br>0.09138 |
| F5  | 0.06361<br>0.45892<br>0.07353  | 0.06361<br>0.45892<br>0.07353  | 0.07725<br>0.45891<br>0.07018  | 0.06929<br>0.46026<br>0.07624  | 0.05939<br>0.46222<br>0.08049  | 0.04565<br>0.46424<br>0.08366  | 0.03583<br>0.46458<br>0.08129  | 0.03237<br>0.46563<br>0.08280  | 0.03386<br>0.46698<br>0.08034  | 0.03092<br>0.47068<br>0.08524  | 0.03338<br>0.46648<br>0.07842  | 0.03784<br>0.46403<br>0.06980  | 0.03497<br>0.46378<br>0.06952  | 0.02986<br>0.46406<br>0.06963  | 0.03673<br>0.46137<br>0.07298  | 0.04596<br>0.46170<br>0.07535  | 0.04603<br>0.46171<br>0.07543  |
| F6  | -0.29889<br>0.42742<br>0.10790 | -0.29889<br>0.42742<br>0.10790 | -0.28557<br>0.42725<br>0.10613 | -0.27778<br>0.42446<br>0.11127 | -0.28035<br>0.42465<br>0.11626 | -0.27446<br>0.42215<br>0.10938 | -0.28459<br>0.42247<br>0.11207 | -0.28531<br>0.42270<br>0.11130 | -0.29306<br>0.42509<br>0.10563 | -0.30155<br>0.42909<br>0.10269 | -0.34269<br>0.43474<br>0.11407 | -0.34638<br>0.43652<br>0.12498 | -0.34313<br>0.43440<br>0.12668 | -0.33915<br>0.43230<br>0.12926 | -0.33988<br>0.43131<br>0.13339 | -0.33603<br>0.43332<br>0.13959 | -0.33602<br>0.43332<br>0.13964 |
| C5  | 0.93995<br>0.72327<br>0.29886  | 0.93995<br>0.72327<br>0.29886  | 0.93620<br>0.72354<br>0.29541  | 0.92309<br>0.72375<br>0.29453  | 0.91965<br>0.72363<br>0.29506  | 0.92325<br>0.72229<br>0.29775  | 0.91890<br>0.72140<br>0.29857  | 0.92242<br>0.72110<br>0.29827  | 0.92177<br>0.72054<br>0.29747  | 0.92117<br>0.72047<br>0.29917  | 0.91597<br>0.72041<br>0.30156  | 0.94985<br>0.72029<br>0.29809  | 0.95966<br>0.72040<br>0.29997  | 0.97334<br>0.72050<br>0.29455  | 0.96797<br>0.71937<br>0.28799  | 0.96051<br>0.71867<br>0.28636  | 0.96051<br>0.71867<br>0.28637  |
| D5A | 1.02312<br>0.73842<br>0.21659  | 1.02312<br>0.73842<br>0.21659  | 1.03031<br>0.73886<br>0.21674  | 1.00974<br>0.73985<br>0.21473  | 1.00450<br>0.73952<br>0.21357  | 1.01257<br>0.73823<br>0.21729  | 1.00621<br>0.73746<br>0.21716  | 1.00646<br>0.73721<br>0.21555  | 1.00521<br>0.73687<br>0.21465  | 1.01051<br>0.73660<br>0.21729  | 1.01162<br>0.73688<br>0.22244  | 1.05383<br>0.73639<br>0.22070  | 1.05718<br>0.73633<br>0.21916  | 1.06923<br>0.73569<br>0.21077  | 1.06086<br>0.73414<br>0.20177  | 1.04528<br>0.73381<br>0.19812  | 1.04532<br>0.73381<br>0.19817  |
| D5B | 0.74549<br>0.72013<br>0.27937  | 0.74549<br>0.72013<br>0.27937  | 0.74390<br>0.72033<br>0.26807  | 0.72961<br>0.71967<br>0.26996  | 0.72538<br>0.71928<br>0.27166  | 0.72910<br>0.71806<br>0.27164  | 0.72407<br>0.71676<br>0.27310  | 0.72638<br>0.71635<br>0.27493  | 0.72514<br>0.71565<br>0.27417  | 0.72391<br>0.71626<br>0.27366  | 0.71917<br>0.71664<br>0.27216  | 0.75271<br>0.71776<br>0.26597  | 0.75967<br>0.71780<br>0.27281  | 0.77208<br>0.71779<br>0.26925  | 0.76588<br>0.71613<br>0.26434  | 0.75619<br>0.71538<br>0.26808  | 0.75618<br>0.71539<br>0.26810  |
| O3  | 0.98132<br>0.74522<br>0.43290  | 0.98132<br>0.74522<br>0.43290  | 0.95920<br>0.74544<br>0.43129  | 0.94854<br>0.74534<br>0.43178  | 0.94664<br>0.74586<br>0.43148  | 0.94479<br>0.74451<br>0.43511  | 0.94018<br>0.74389<br>0.43607  | 0.94836<br>0.74370<br>0.43585  | 0.94750<br>0.74304<br>0.43591  | 0.94568<br>0.74279<br>0.43859  | 0.93392<br>0.74198<br>0.44338  | 0.96786<br>0.74143<br>0.44135  | 0.98966<br>0.74194<br>0.44244  | 1.00767<br>0.74331<br>0.43447  | 1.00350<br>0.74327<br>0.42566  | 1.00820<br>0.74214<br>0.42451  | 1.00816<br>0.74215<br>0.42447  |
| D3  | 1.12776<br>0.75747<br>0.44825  | 1.12776<br>0.75747<br>0.44825  | 1.10211<br>0.75827<br>0.45160  | 1.09026<br>0.75877<br>0.45071  | 1.08985<br>0.75916<br>0.44973  | 1.08428<br>0.75879<br>0.45320  | 1.07986<br>0.75833<br>0.45387  | 1.08447<br>0.75919<br>0.45007  | 1.08887<br>0.75745<br>0.45284  | 1.09045<br>0.75641<br>0.45798  | 1.07991<br>0.75503<br>0.46700  | 1.10279<br>0.75735<br>0.45983  | 1.13287<br>0.75646<br>0.45984  | 1.16174<br>0.75511<br>0.45488  | 1.16679<br>0.75027<br>0.45615  | 1.16911<br>0.75239<br>0.44345  | 1.16908<br>0.75240<br>0.44340  |
| C6  | 1.07447<br>0.68299<br>0.30942  | 1.07447<br>0.68299<br>0.30942  | 1.07054<br>0.68320<br>0.31085  | 1.06761<br>0.68389<br>0.30592  | 1.06641<br>0.68382<br>0.30802  | 1.06899<br>0.68227<br>0.31238  | 1.06888<br>0.68155<br>0.31347  | 1.07420<br>0.68124<br>0.31171  | 1.07558<br>0.68068<br>0.31010  | 1.06856<br>0.67999<br>0.31283  | 1.06025<br>0.67957<br>0.31468  | 1.08239<br>0.67849<br>0.31133  | 1.09355<br>0.67857<br>0.31143  | 1.10704<br>0.67863<br>0.31013  | 1.10610<br>0.67779<br>0.30696  | 1.10128<br>0.67704<br>0.29949  | 1.10129<br>0.67704<br>0.29949  |
| F7  | 1.34086<br>0.68546<br>0.34607  | 1.34086<br>0.68546<br>0.34607  | 1.33095<br>0.68571<br>0.36123  | 1.33089<br>0.68753<br>0.35226  | 1.32755<br>0.68771<br>0.35934  | 1.32986<br>0.68604<br>0.36607  | 1.33176<br>0.68591<br>0.36523  | 1.33786<br>0.68569<br>0.36341  | 1.34066<br>0.68531<br>0.36093  | 1.33522<br>0.68374<br>0.36374  | 1.32710<br>0.68273<br>0.36763  | 1.34967<br>0.67996<br>0.36622  | 1.36249<br>0.68004<br>0.36519  | 1.37843<br>0.68042<br>0.36113  | 1.37904<br>0.68041<br>0.35618  | 1.37873<br>0.67965<br>0.34168  | 1.37875<br>0.67964<br>0.34167  |
| F8  | 0.95810<br>0.65966<br>0.41186  | 0.95810<br>0.65966<br>0.41186  | 0.93720<br>0.65935<br>0.40579  | 0.94472<br>0.65900<br>0.40250  | 0.93874<br>0.65849<br>0.40191  | 0.93727<br>0.65703<br>0.40572  | 0.94126<br>0.65622<br>0.40913  | 0.94753<br>0.65553<br>0.40697  | 0.95067<br>0.65477<br>0.40606  | 0.93879<br>0.65468<br>0.40972  | 0.92584<br>0.65419<br>0.40999  | 0.93818<br>0.65381<br>0.40551  | 0.95094<br>0.65360<br>0.40591  | 0.96676<br>0.65459<br>0.40954  | 0.96961<br>0.65418<br>0.40990  | 0.97425<br>0.65294<br>0.40504  | 0.97422<br>0.65293<br>0.40501  |
| F9  | 1.06195<br>0.65662<br>0.20094  | 1.06195<br>0.65662<br>0.20094  | 1.07759<br>0.65716<br>0.20074  | 1.07421<br>0.65817<br>0.19396  | 1.08141<br>0.65826<br>0.19523  | 1.08652<br>0.65655<br>0.19958  | 1.08567<br>0.65551<br>0.20089  | 1.09139<br>0.65543<br>0.19795  | 1.09213<br>0.65487<br>0.19569  | 1.08075<br>0.65385<br>0.19867  | 1.07276<br>0.65366<br>0.19930  | 1.08996<br>0.65259<br>0.19519  | 1.09966<br>0.65286<br>0.19418  | 1.10870<br>0.65179<br>0.19587  | 1.10790<br>0.65013<br>0.19511  | 1.09378<br>0.64976<br>0.18590  | 1.09383<br>0.64975<br>0.18595  |



|     |         |         |         |         |         |         |         |         |         |         |         |         |         |         |         |         |         |
|-----|---------|---------|---------|---------|---------|---------|---------|---------|---------|---------|---------|---------|---------|---------|---------|---------|---------|
| C7  | 0.58066 | 0.58066 | 0.59347 | 0.58980 | 0.58349 | 0.58584 | 0.58657 | 0.58764 | 0.58994 | 0.57669 | 0.56487 | 0.55571 | 0.54802 | 0.53888 | 0.53436 | 0.52838 | 0.52836 |
|     | 0.81794 | 0.81794 | 0.81818 | 0.81874 | 0.81954 | 0.82140 | 0.82264 | 0.82374 | 0.82366 | 0.82561 | 0.82620 | 0.82442 | 0.82308 | 0.82132 | 0.82202 | 0.82297 | 0.82297 |
|     | 0.43087 | 0.43087 | 0.42648 | 0.42518 | 0.42600 | 0.42536 | 0.42612 | 0.42775 | 0.42505 | 0.42109 | 0.41653 | 0.41935 | 0.41809 | 0.41771 | 0.41678 | 0.42054 | 0.42051 |
| D7A | 0.78080 | 0.78080 | 0.79512 | 0.79115 | 0.78555 | 0.78960 | 0.79074 | 0.79137 | 0.79412 | 0.78103 | 0.76919 | 0.75866 | 0.75148 | 0.74320 | 0.74010 | 0.73485 | 0.73484 |
|     | 0.82210 | 0.82210 | 0.82094 | 0.82198 | 0.82289 | 0.82442 | 0.82647 | 0.82838 | 0.82860 | 0.83110 | 0.83228 | 0.83164 | 0.83008 | 0.82801 | 0.82851 | 0.82960 | 0.82960 |
|     | 0.44004 | 0.44004 | 0.43794 | 0.44121 | 0.44126 | 0.43662 | 0.43574 | 0.43927 | 0.43617 | 0.43116 | 0.42624 | 0.43137 | 0.43314 | 0.43414 | 0.43075 | 0.43301 | 0.43298 |
| D7B | 0.48622 | 0.48622 | 0.50364 | 0.49325 | 0.48695 | 0.49412 | 0.49183 | 0.48702 | 0.48780 | 0.47210 | 0.45720 | 0.44062 | 0.43149 | 0.42262 | 0.42087 | 0.41529 | 0.41524 |
|     | 0.83880 | 0.83880 | 0.83983 | 0.84017 | 0.84128 | 0.84368 | 0.84485 | 0.84590 | 0.84581 | 0.84801 | 0.84845 | 0.84560 | 0.84406 | 0.84223 | 0.84296 | 0.84361 | 0.84362 |
|     | 0.48428 | 0.48428 | 0.47868 | 0.47587 | 0.47563 | 0.47532 | 0.47563 | 0.47464 | 0.47178 | 0.46515 | 0.46012 | 0.46523 | 0.46477 | 0.46566 | 0.46705 | 0.47326 | 0.47321 |
| O4  | 0.51784 | 0.51784 | 0.51568 | 0.51112 | 0.50552 | 0.50845 | 0.51711 | 0.52172 | 0.52663 | 0.51758 | 0.51068 | 0.50982 | 0.49768 | 0.48508 | 0.48183 | 0.47937 | 0.47932 |
|     | 0.78027 | 0.78027 | 0.78101 | 0.78115 | 0.78214 | 0.78443 | 0.78558 | 0.78674 | 0.78658 | 0.78907 | 0.78961 | 0.78666 | 0.78477 | 0.78262 | 0.78315 | 0.78370 | 0.78369 |
|     | 0.49448 | 0.49448 | 0.49009 | 0.48659 | 0.49059 | 0.49458 | 0.49845 | 0.50232 | 0.50080 | 0.50220 | 0.49913 | 0.49681 | 0.49152 | 0.48817 | 0.48697 | 0.48900 | 0.48894 |
| D4  | 0.62487 | 0.62487 | 0.61749 | 0.61654 | 0.60469 | 0.59985 | 0.59749 | 0.58716 | 0.58879 | 0.55173 | 0.54074 | 0.52113 | 0.51307 | 0.49464 | 0.47297 | 0.46169 | 0.46166 |
|     | 0.76108 | 0.76108 | 0.76104 | 0.76140 | 0.76180 | 0.76344 | 0.76413 | 0.76480 | 0.76454 | 0.76641 | 0.76690 | 0.76456 | 0.76293 | 0.76105 | 0.76191 | 0.76283 | 0.76282 |
|     | 0.48488 | 0.48488 | 0.48244 | 0.48125 | 0.47972 | 0.47913 | 0.47439 | 0.47103 | 0.46785 | 0.46249 | 0.45836 | 0.44838 | 0.44147 | 0.43558 | 0.43187 | 0.43212 | 0.43209 |
| C8  | 0.49856 | 0.49856 | 0.51769 | 0.52574 | 0.51765 | 0.50946 | 0.50598 | 0.51305 | 0.51431 | 0.50022 | 0.48800 | 0.48364 | 0.48204 | 0.47488 | 0.46265 | 0.45135 | 0.45137 |
|     | 0.81906 | 0.81906 | 0.81962 | 0.82025 | 0.82018 | 0.82126 | 0.82152 | 0.82147 | 0.82103 | 0.82121 | 0.82122 | 0.82065 | 0.82050 | 0.81973 | 0.82085 | 0.82247 | 0.82247 |
|     | 0.26874 | 0.26874 | 0.26287 | 0.25948 | 0.25976 | 0.25964 | 0.26023 | 0.26080 | 0.25768 | 0.25377 | 0.24892 | 0.25017 | 0.24745 | 0.24622 | 0.24561 | 0.24958 | 0.24962 |
| F10 | 0.49658 | 0.49658 | 0.53753 | 0.56224 | 0.55953 | 0.54204 | 0.52608 | 0.54134 | 0.54233 | 0.52878 | 0.50753 | 0.50880 | 0.52561 | 0.53885 | 0.55261 | 0.56029 | 0.56036 |
|     | 0.85217 | 0.85217 | 0.85238 | 0.85271 | 0.85200 | 0.85297 | 0.85328 | 0.85245 | 0.85189 | 0.85106 | 0.85120 | 0.85131 | 0.85118 | 0.84989 | 0.84884 | 0.84852 | 0.84852 |
|     | 0.18972 | 0.18972 | 0.18210 | 0.17799 | 0.17485 | 0.17196 | 0.17063 | 0.16767 | 0.16325 | 0.15440 | 0.14875 | 0.15278 | 0.15193 | 0.15150 | 0.14776 | 0.14975 | 0.14983 |
| F11 | 0.23244 | 0.23244 | 0.24742 | 0.25452 | 0.24477 | 0.23452 | 0.23087 | 0.23720 | 0.23738 | 0.22221 | 0.21042 | 0.20533 | 0.20190 | 0.19365 | 0.18308 | 0.17700 | 0.17701 |
|     | 0.81055 | 0.81055 | 0.81433 | 0.81682 | 0.81769 | 0.81794 | 0.81620 | 0.81684 | 0.81636 | 0.81646 | 0.81482 | 0.81483 | 0.81741 | 0.82024 | 0.82717 | 0.83331 | 0.83332 |
|     | 0.24706 | 0.24706 | 0.23851 | 0.22948 | 0.23084 | 0.23586 | 0.23857 | 0.23643 | 0.23373 | 0.23074 | 0.22652 | 0.22447 | 0.21763 | 0.21462 | 0.21675 | 0.22261 | 0.22265 |
| F12 | 0.63954 | 0.63954 | 0.64651 | 0.65111 | 0.63683 | 0.62830 | 0.63330 | 0.63920 | 0.64048 | 0.62582 | 0.62228 | 0.61806 | 0.60562 | 0.58022 | 0.53056 | 0.48877 | 0.48882 |
|     | 0.79299 | 0.79299 | 0.79147 | 0.79087 | 0.78969 | 0.79073 | 0.79156 | 0.79042 | 0.78974 | 0.78904 | 0.78971 | 0.78930 | 0.78806 | 0.78584 | 0.78467 | 0.78514 | 0.78514 |
|     | 0.18740 | 0.18740 | 0.18402 | 0.18394 | 0.18628 | 0.18515 | 0.18573 | 0.19116 | 0.18855 | 0.18910 | 0.18420 | 0.18364 | 0.18092 | 0.17942 | 0.18008 | 0.18474 | 0.18480 |

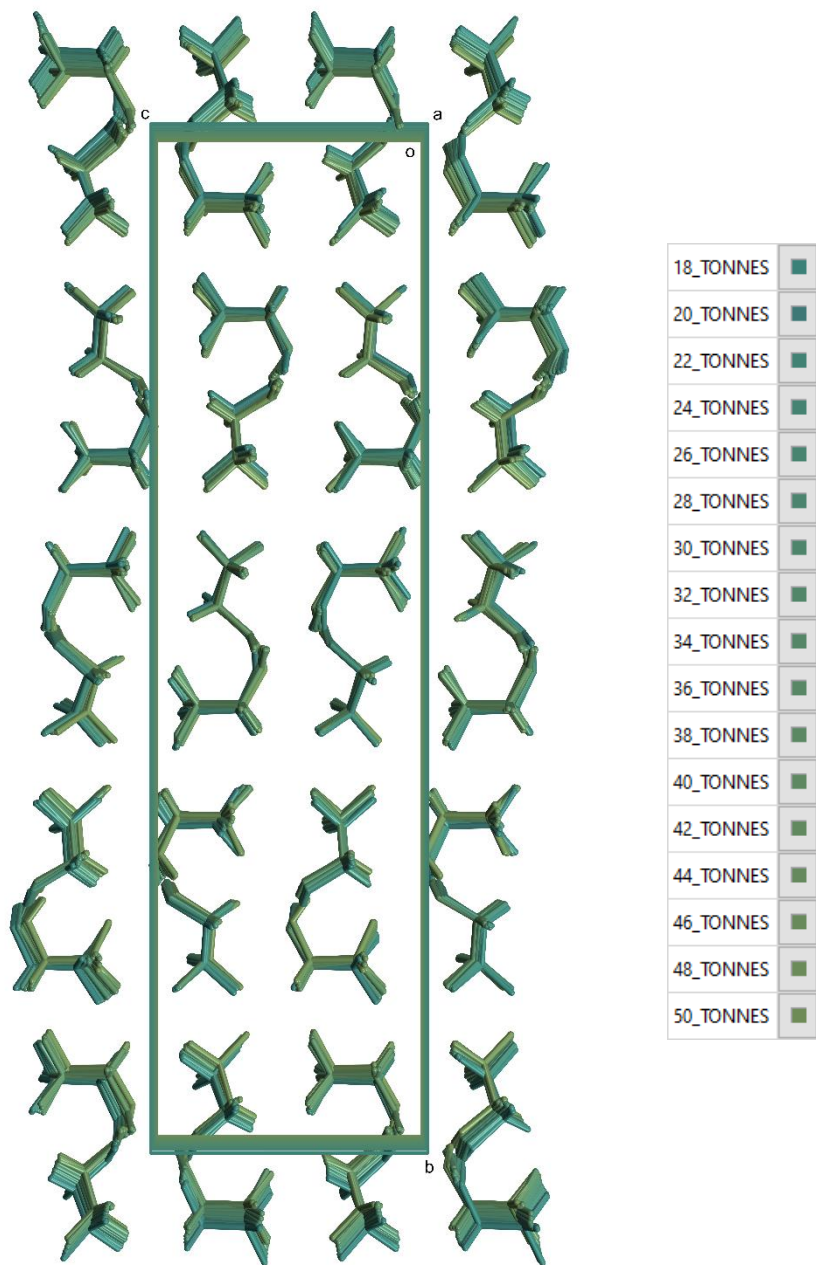

**Figure S2.6:** Packing of the TFE structures refined from the neutron powder-diffraction data from PEARL at 245 K showing an overlay of Form 3 at pressures from 0.46(3) GPa to 3.09(3) GPa. Progression from 0.46 GPa (18T, cyan) to 3.09 GPa (50T, green) is show by successively greener shading.

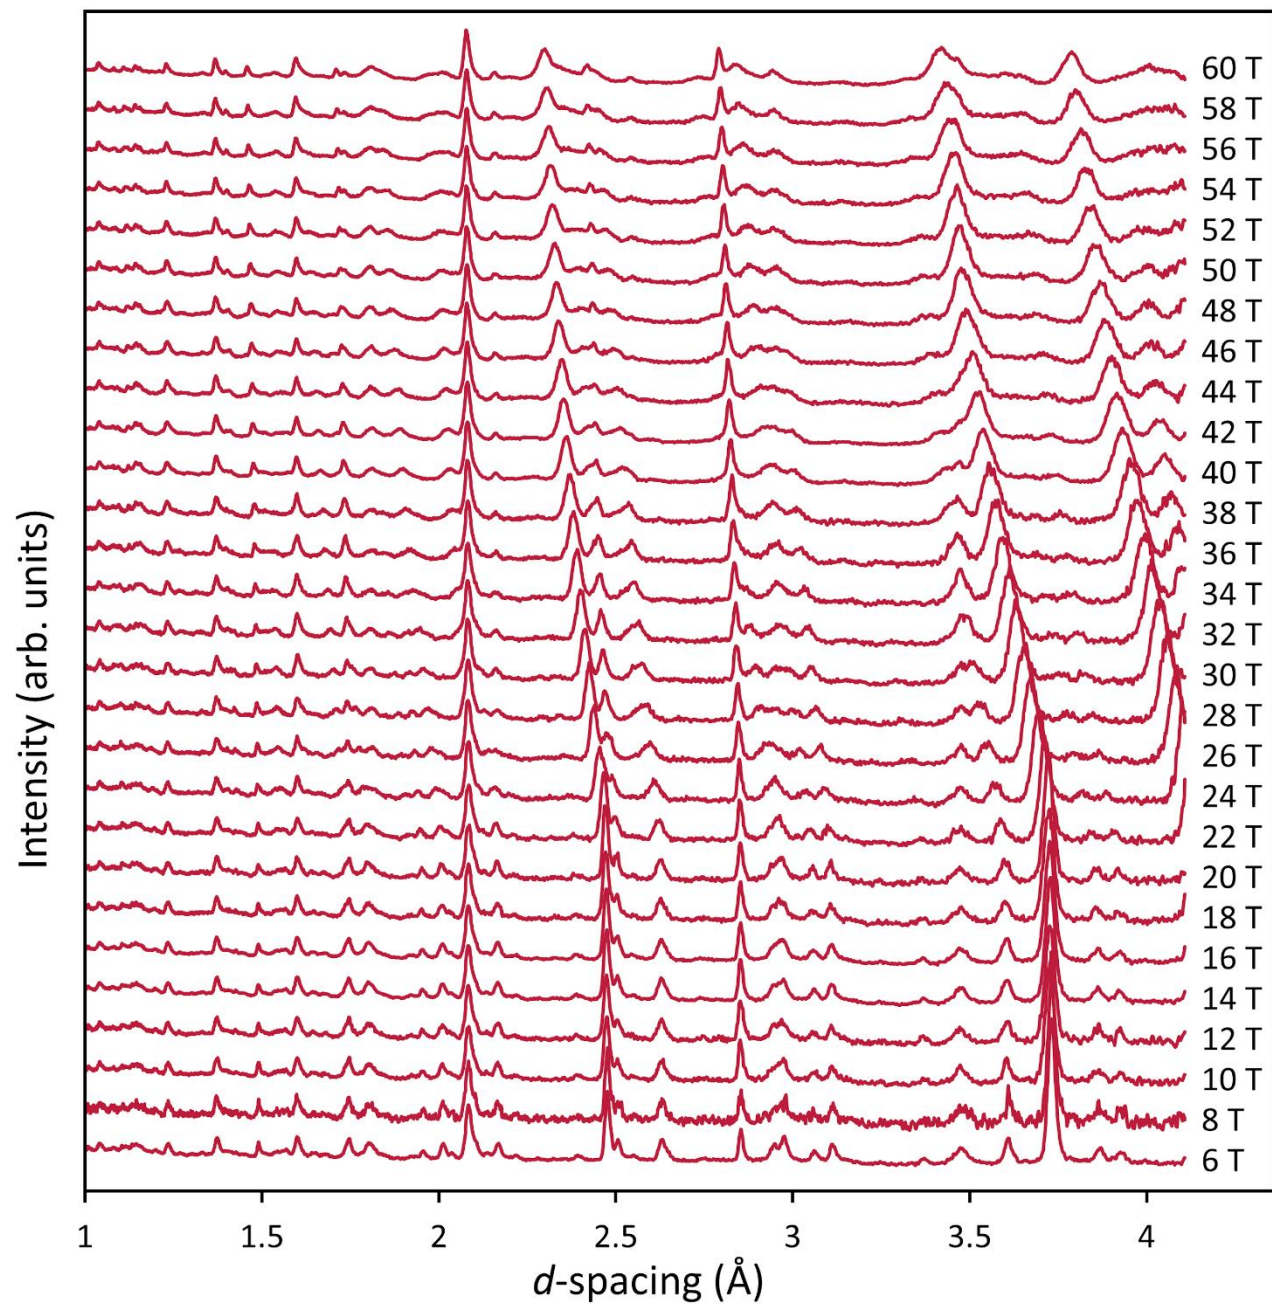

**Figure S2.7:** Neutron powder-diffraction patterns of TFE obtained from PEARL, collected at 200 K, shown with increasing pressure (Form 1 – red).

**Table S2.5:** Crystallographic data for the high-pressure neutron powder studies of TFE at 200 K on PEARL

| Load (T) | Pressure (GPa) * | wR      | Form | Space Group               | a (Å)      | b (Å)      | c (Å)      | $\alpha$ (°) | $\beta$ (°) | $\gamma$ (°) | V (Å <sup>3</sup> ) | Density (g/cm <sup>3</sup> ) | Z / Z' | VpM (Å <sup>3</sup> ) ** |
|----------|------------------|---------|------|---------------------------|------------|------------|------------|--------------|-------------|--------------|---------------------|------------------------------|--------|--------------------------|
| 18       | 0.10(3)          | 0.08208 | 1    | <i>Pca</i> 2 <sub>1</sub> | 8.5133(15) | 9.9969(21) | 9.0796(15) | 90           | 90          | 90           | 772.74(17)          | 1.7889                       | 8 / 2  | 96.59(17)                |
| 20       | 0.10(3)          | 0.08578 | 1    | <i>Pca</i> 2 <sub>1</sub> | 8.5104(15) | 9.9962(19) | 9.0779(14) | 90           | 90          | 90           | 772.28(15)          | 1.7899                       | 8 / 2  | 96.54(15)                |
| 22       | 0.19(3)          | 0.08452 | 1    | <i>Pca</i> 2 <sub>1</sub> | 8.4824(16) | 9.980(2)   | 9.0581(16) | 90           | 90          | 90           | 766.83(17)          | 1.8026                       | 8 / 2  | 95.85(17)                |
| 24       | 0.24(3)          | 0.08398 | 1    | <i>Pca</i> 2 <sub>1</sub> | 8.4360(19) | 9.947(3)   | 9.0161(19) | 90           | 90          | 90           | 756.6(2)            | 1.8271                       | 8 / 2  | 94.6(2)                  |
| 26       | 0.34(3)          | 0.08411 | 1    | <i>Pca</i> 2 <sub>1</sub> | 8.3801(17) | 9.904(3)   | 8.9544(19) | 90           | 90          | 90           | 743.2(2)            | 1.8600                       | 8 / 2  | 92.9(2)                  |
| 28       | 0.46(3)          | 0.08850 | 1    | <i>Pca</i> 2 <sub>1</sub> | 8.327(2)   | 9.870(3)   | 8.9025(16) | 90           | 90          | 90           | 731.7(2)            | 1.8891                       | 8 / 2  | 91.5(2)                  |
| 30       | 0.61(3)          | 0.08619 | 1    | <i>Pca</i> 2 <sub>1</sub> | 8.277(2)   | 9.837(3)   | 8.8472(16) | 90           | 90          | 90           | 720.3(2)            | 1.9191                       | 8 / 2  | 90.0(2)                  |
| 32       | 0.80(3)          | 0.08574 | 1    | <i>Pca</i> 2 <sub>1</sub> | 8.233(2)   | 9.804(3)   | 8.7961(17) | 90           | 90          | 90           | 710.0(2)            | 1.9469                       | 8 / 2  | 88.8(2)                  |
| 34       | 0.99(3)          | 0.08045 | 1    | <i>Pca</i> 2 <sub>1</sub> | 8.2009(18) | 9.766(3)   | 8.7407(16) | 90           | 90          | 90           | 700.0(2)            | 1.9748                       | 8 / 2  | 87.5(2)                  |
| 36       | 1.17(3)          | 0.07944 | 1    | <i>Pca</i> 2 <sub>1</sub> | 8.1618(17) | 9.742(3)   | 8.6942(16) | 90           | 90          | 90           | 691.3(2)            | 1.9997                       | 8 / 2  | 86.4(2)                  |
| 38       | 1.39(3)          | 0.07788 | 1    | <i>Pca</i> 2 <sub>1</sub> | 8.1288(18) | 9.712(3)   | 8.6541(17) | 90           | 90          | 90           | 683.2(2)            | 2.0234                       | 8 / 2  | 85.4(2)                  |
| 40 ^^    | 1.59(3)          | 0.07450 | 1    | <i>Pca</i> 2 <sub>1</sub> | 8.0932(18) | 9.680(3)   | 8.5999(17) | 90           | 90          | 90           | 673.7(2)            | 2.0518                       | 8 / 2  | 84.2(2)                  |

\* Pressure calculated using the refined value for the Pb  $a$ -axis<sup>1</sup>

\*\* VpM: volume per molecule calculated by dividing the unit cell volume by Z and used for Figure 9 of the main text (volume per formula unit)

^^ Although data was collected up to 60T, Rietveld refinements were not performed on the data collected beyond 40T (1.60 GPa) due to the onset of non-hydrostatic conditions, as indicated by peak broadening

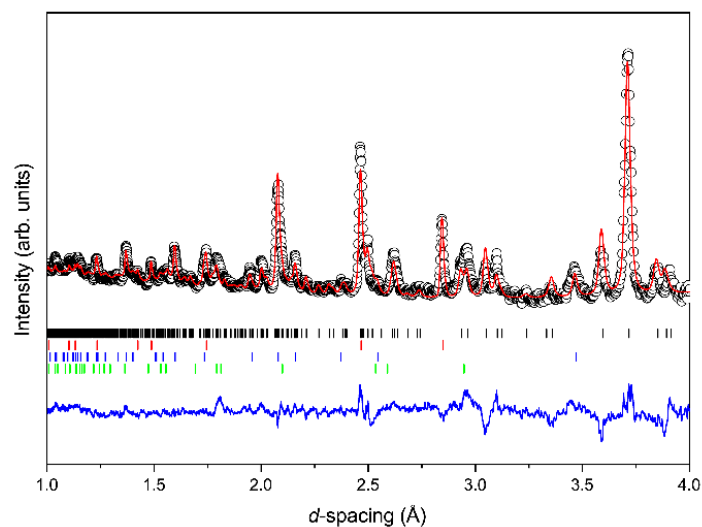

**Figure 2.8:** Rietveld refinement of the 200 K data at 0.10(3) GPa, corresponding to the powder neutron diffraction pattern collected at 20T (black circle – observed data; red line – calculated patterns; black tick marks – TFE; green tick marks – Al<sub>2</sub>O<sub>3</sub>; red tick marks – Pb; blue tick marks – ZrO<sub>2</sub>; blue line – difference between observed and calculated data). The poor fit for Form 1 is likely to be due to the formation of coarse crystalline grains on initial freezing.

**Table S2.6:** Atomic positions for the structures refined from the high-pressure neutron powder-diffraction studies at 200 K on PEARL (Form 1)

| Form 1 | 18T      | 20T      | 22T      | 24T      | 26T      | 28T      | 30T      | 32T      | 34T      | 36T      | 38T      | 40T      |         |
|--------|----------|----------|----------|----------|----------|----------|----------|----------|----------|----------|----------|----------|---------|
| Atom   | 0.10 GPa | 0.10 GPa | 0.19 GPa | 0.24 GPa | 0.34 GPa | 0.46 GPa | 0.61 GPa | 0.80 GPa | 0.99 GPa | 1.17 GPa | 1.39 GPa | 1.59 GPa |         |
| C1     | x        | 0.14118  | 0.14372  | 0.14413  | 0.14078  | 0.13802  | 0.14888  | 0.15491  | 0.17532  | 0.16679  | 0.16553  | 0.16552  | 0.16656 |
|        | y        | 0.16923  | 0.17096  | 0.16732  | 0.16470  | 0.16077  | 0.17181  | 0.17859  | 0.18546  | 0.17886  | 0.17532  | 0.17347  | 0.17368 |
|        | z        | 0.45039  | 0.44572  | 0.44552  | 0.44627  | 0.44753  | 0.44962  | 0.45109  | 0.45034  | 0.45212  | 0.45264  | 0.45284  | 0.45233 |
| D1A    |          | 0.07867  | 0.07426  | 0.07441  | 0.07110  | 0.06887  | 0.08137  | 0.08762  | 0.10898  | 0.10889  | 0.10786  | 0.10821  | 0.10904 |
|        |          | 0.16112  | 0.16014  | 0.15723  | 0.15255  | 0.14493  | 0.14940  | 0.15228  | 0.15994  | 0.14483  | 0.13941  | 0.13677  | 0.13896 |
|        |          | 0.53723  | 0.52742  | 0.52748  | 0.52860  | 0.53039  | 0.53266  | 0.53366  | 0.53467  | 0.53887  | 0.53925  | 0.53986  | 0.54099 |
| D1B    |          | 0.08172  | 0.09149  | 0.09166  | 0.08789  | 0.08466  | 0.09488  | 0.09990  | 0.12116  | 0.11605  | 0.11392  | 0.11382  | 0.11605 |
|        |          | 0.13926  | 0.14389  | 0.13957  | 0.13831  | 0.13618  | 0.14999  | 0.16120  | 0.16211  | 0.14609  | 0.14454  | 0.14248  | 0.13867 |
|        |          | 0.36458  | 0.35472  | 0.35461  | 0.35448  | 0.35452  | 0.35533  | 0.35542  | 0.35511  | 0.35798  | 0.35741  | 0.35715  | 0.35709 |
| O1     |          | 0.18081  | 0.18479  | 0.18564  | 0.18127  | 0.17560  | 0.17999  | 0.18644  | 0.19963  | 0.16037  | 0.15932  | 0.15768  | 0.15575 |
|        |          | 0.30336  | 0.30562  | 0.30205  | 0.30034  | 0.29788  | 0.31059  | 0.31756  | 0.32622  | 0.32160  | 0.31840  | 0.31685  | 0.31750 |
|        |          | 0.43030  | 0.43385  | 0.43236  | 0.43608  | 0.44206  | 0.45218  | 0.46149  | 0.45380  | 0.45304  | 0.45743  | 0.45818  | 0.45158 |
| D1     |          | 0.24374  | 0.24433  | 0.23699  | 0.24040  | 0.23940  | 0.27122  | 0.27719  | 0.28008  | 0.23297  | 0.23364  | 0.23230  | 0.22596 |
|        |          | 0.33902  | 0.33893  | 0.33809  | 0.33365  | 0.32939  | 0.33762  | 0.34364  | 0.35740  | 0.36527  | 0.36127  | 0.36033  | 0.36338 |
|        |          | 0.48641  | 0.49476  | 0.49807  | 0.49832  | 0.50218  | 0.47024  | 0.48504  | 0.49652  | 0.49540  | 0.49904  | 0.49938  | 0.49711 |
| C2     |          | 0.28317  | 0.28431  | 0.28504  | 0.28330  | 0.28344  | 0.29950  | 0.30624  | 0.33146  | 0.33701  | 0.33646  | 0.33773  | 0.34045 |
|        |          | 0.08557  | 0.08665  | 0.08281  | 0.08045  | 0.07800  | 0.09340  | 0.09949  | 0.11198  | 0.13020  | 0.12631  | 0.12568  | 0.12825 |
|        |          | 0.46333  | 0.46555  | 0.46619  | 0.46455  | 0.46186  | 0.45717  | 0.45314  | 0.45634  | 0.45544  | 0.45372  | 0.45341  | 0.45606 |
| F1     |          | 0.27819  | 0.27769  | 0.27792  | 0.27676  | 0.28034  | 0.30294  | 0.31041  | 0.34238  | 0.37534  | 0.37481  | 0.37763  | 0.38308 |
|        |          | -0.04335 | -0.04201 | -0.04579 | -0.04793 | -0.05213 | -0.03499 | -0.02933 | -0.01580 | 0.00272  | -0.00224 | -0.00296 | 0.00013 |
|        |          | 0.46974  | 0.47629  | 0.48025  | 0.48462  | 0.46982  | 0.48432  | 0.48077  | 0.49031  | 0.47094  | 0.44882  | 0.45599  | 0.46763 |
| F2     |          | 0.38729  | 0.39199  | 0.39210  | 0.38568  | 0.38902  | 0.38878  | 0.39061  | 0.41582  | 0.42154  | 0.42596  | 0.42433  | 0.42637 |
|        |          | 0.11113  | 0.10845  | 0.10216  | 0.09590  | 0.10398  | 0.10795  | 0.11351  | 0.12430  | 0.17114  | 0.18299  | 0.17741  | 0.17488 |
|        |          | 0.35953  | 0.36389  | 0.36282  | 0.35535  | 0.35654  | 0.33584  | 0.32767  | 0.32964  | 0.33554  | 0.34459  | 0.33837  | 0.33682 |
| F3     |          | 0.35382  | 0.35106  | 0.35350  | 0.35851  | 0.35462  | 0.38826  | 0.40066  | 0.42403  | 0.41459  | 0.40919  | 0.41363  | 0.41600 |
|        |          | 0.10310  | 0.10736  | 0.10599  | 0.10819  | 0.09767  | 0.12976  | 0.13606  | 0.15653  | 0.17377  | 0.15259  | 0.15935  | 0.17023 |
|        |          | 0.59163  | 0.59513  | 0.59485  | 0.58956  | 0.59186  | 0.57362  | 0.56666  | 0.56872  | 0.57880  | 0.58640  | 0.58320  | 0.58396 |
| C3     |          | 0.86612  | 0.86547  | 0.86996  | 0.86750  | 0.86836  | 0.86050  | 0.86121  | 0.85327  | 0.84428  | 0.84266  | 0.84074  | 0.84293 |
|        |          | 0.43262  | 0.43317  | 0.43538  | 0.43681  | 0.43437  | 0.43028  | 0.42030  | 0.42227  | 0.42584  | 0.42677  | 0.42839  | 0.42639 |
|        |          | 0.19572  | 0.19452  | 0.20085  | 0.19783  | 0.20710  | 0.21750  | 0.21215  | 0.23718  | 0.26114  | 0.26252  | 0.26590  | 0.27422 |
| D3A    |          | 0.93012  | 0.92825  | 0.92659  | 0.93036  | 0.93391  | 0.92444  | 0.91938  | 0.91103  | 0.91120  | 0.90696  | 0.90749  | 0.91164 |
|        |          | 0.39595  | 0.40150  | 0.41099  | 0.40563  | 0.40230  | 0.37813  | 0.36876  | 0.37218  | 0.37030  | 0.36938  | 0.37188  | 0.36974 |
|        |          | 0.11942  | 0.11466  | 0.11386  | 0.11680  | 0.12749  | 0.14984  | 0.13872  | 0.16146  | 0.19687  | 0.19714  | 0.20101  | 0.21043 |
| D3B    |          | 0.92494  | 0.92656  | 0.93717  | 0.92925  | 0.92715  | 0.91950  | 0.92511  | 0.92243  | 0.90332  | 0.90614  | 0.90132  | 0.90005 |
|        |          | 0.43628  | 0.43301  | 0.42511  | 0.43470  | 0.43146  | 0.44651  | 0.42933  | 0.43728  | 0.45017  | 0.45362  | 0.45365  | 0.44929 |
|        |          | 0.28794  | 0.28554  | 0.28759  | 0.28937  | 0.30116  | 0.31056  | 0.30435  | 0.32576  | 0.35420  | 0.35279  | 0.35909  | 0.37082 |
| O2     |          | 0.82309  | 0.81880  | 0.82506  | 0.82206  | 0.82592  | 0.82612  | 0.83196  | 0.80952  | 0.80488  | 0.79942  | 0.80036  | 0.80853 |
|        |          | 0.56254  | 0.56420  | 0.56950  | 0.56933  | 0.56803  | 0.55500  | 0.54995  | 0.54889  | 0.54609  | 0.54524  | 0.54860  | 0.54889 |
|        |          | 0.15692  | 0.16489  | 0.19011  | 0.17048  | 0.17828  | 0.15134  | 0.15449  | 0.17758  | 0.18333  | 0.18198  | 0.18625  | 0.19515 |

|    |                               |                               |                               |                               |                               |                               |                               |                               |                               |                               |                               |                               |
|----|-------------------------------|-------------------------------|-------------------------------|-------------------------------|-------------------------------|-------------------------------|-------------------------------|-------------------------------|-------------------------------|-------------------------------|-------------------------------|-------------------------------|
| D2 | 0.74658<br>0.59743<br>0.19626 | 0.73735<br>0.59318<br>0.20125 | 0.73113<br>0.58893<br>0.18660 | 0.73714<br>0.59702<br>0.20271 | 0.73800<br>0.59579<br>0.20435 | 0.77677<br>0.61252<br>0.19928 | 0.77752<br>0.60398<br>0.20348 | 0.80930<br>0.61628<br>0.23290 | 0.78073<br>0.61506<br>0.23192 | 0.76090<br>0.61100<br>0.22861 | 0.77500<br>0.61803<br>0.23474 | 0.76792<br>0.61427<br>0.24235 |
| C4 | 0.72630<br>0.34808<br>0.21868 | 0.72800<br>0.34535<br>0.21513 | 0.73114<br>0.34795<br>0.21902 | 0.72769<br>0.34954<br>0.21711 | 0.72559<br>0.34844<br>0.22207 | 0.71150<br>0.35660<br>0.25448 | 0.70857<br>0.35108<br>0.25043 | 0.70867<br>0.34523<br>0.28631 | 0.69584<br>0.35018<br>0.30505 | 0.69580<br>0.35213<br>0.31510 | 0.69135<br>0.35292<br>0.31253 | 0.68937<br>0.35221<br>0.31357 |
| F4 | 0.75659<br>0.24698<br>0.30820 | 0.76156<br>0.24210<br>0.30060 | 0.76323<br>0.24322<br>0.30324 | 0.75737<br>0.24901<br>0.30897 | 0.75034<br>0.24722<br>0.31554 | 0.73893<br>0.25608<br>0.34921 | 0.73084<br>0.25517<br>0.35306 | 0.74500<br>0.25491<br>0.39266 | 0.72889<br>0.25042<br>0.40253 | 0.73469<br>0.24742<br>0.40479 | 0.72667<br>0.24851<br>0.40483 | 0.71846<br>0.24544<br>0.40550 |
| F5 | 0.67187<br>0.29721<br>0.09475 | 0.67391<br>0.29733<br>0.08967 | 0.67761<br>0.30183<br>0.09214 | 0.67858<br>0.29673<br>0.09108 | 0.67995<br>0.29587<br>0.09369 | 0.64144<br>0.30444<br>0.13488 | 0.64020<br>0.29337<br>0.13208 | 0.63916<br>0.27852<br>0.17357 | 0.62132<br>0.29464<br>0.18666 | 0.60825<br>0.30306<br>0.20011 | 0.60972<br>0.30277<br>0.19347 | 0.61178<br>0.30509<br>0.18961 |
| F6 | 0.60258<br>0.38940<br>0.28723 | 0.60376<br>0.38220<br>0.28596 | 0.60613<br>0.38464<br>0.28960 | 0.59940<br>0.38928<br>0.28178 | 0.59490<br>0.38999<br>0.28297 | 0.59516<br>0.41036<br>0.32969 | 0.59095<br>0.41108<br>0.31927 | 0.58915<br>0.40078<br>0.35842 | 0.57969<br>0.40438<br>0.38429 | 0.58890<br>0.40537<br>0.40689 | 0.57905<br>0.40603<br>0.39962 | 0.57388<br>0.40580<br>0.39779 |



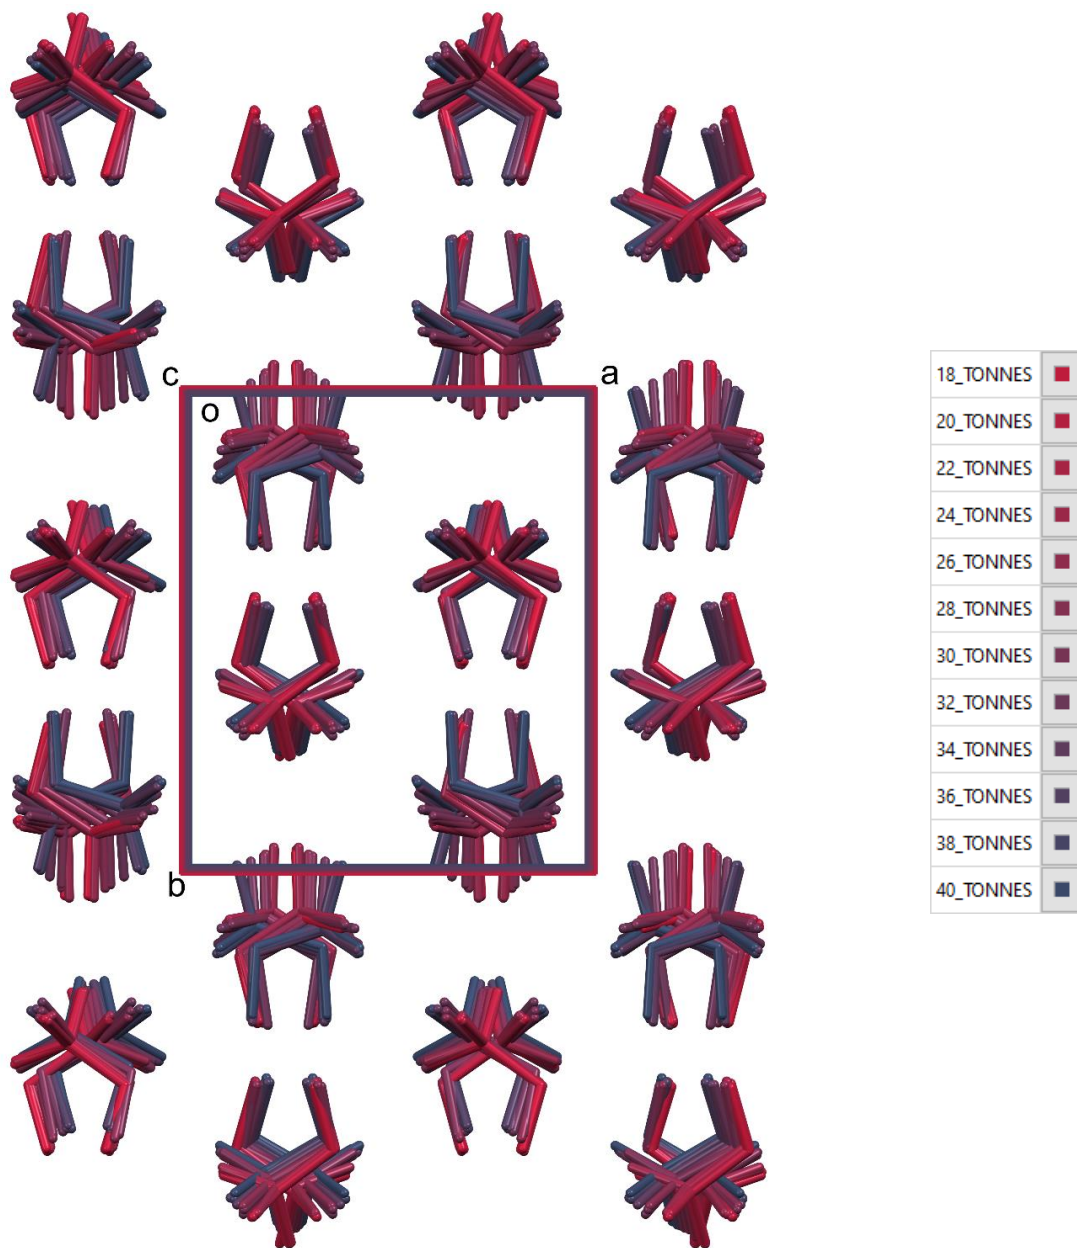

**Figure S2.9:** Packing of the TFE structures refined from the neutron powder-diffraction data from PEARL at 200 K showing an overlay of packing of Form 1 at pressures from 0.10(3) GPa to 1.59(3) GPa. Progression from 0.10 GPa (18T, red) to 1.59 GPa (40T, blue) is show by successively bluer shading.

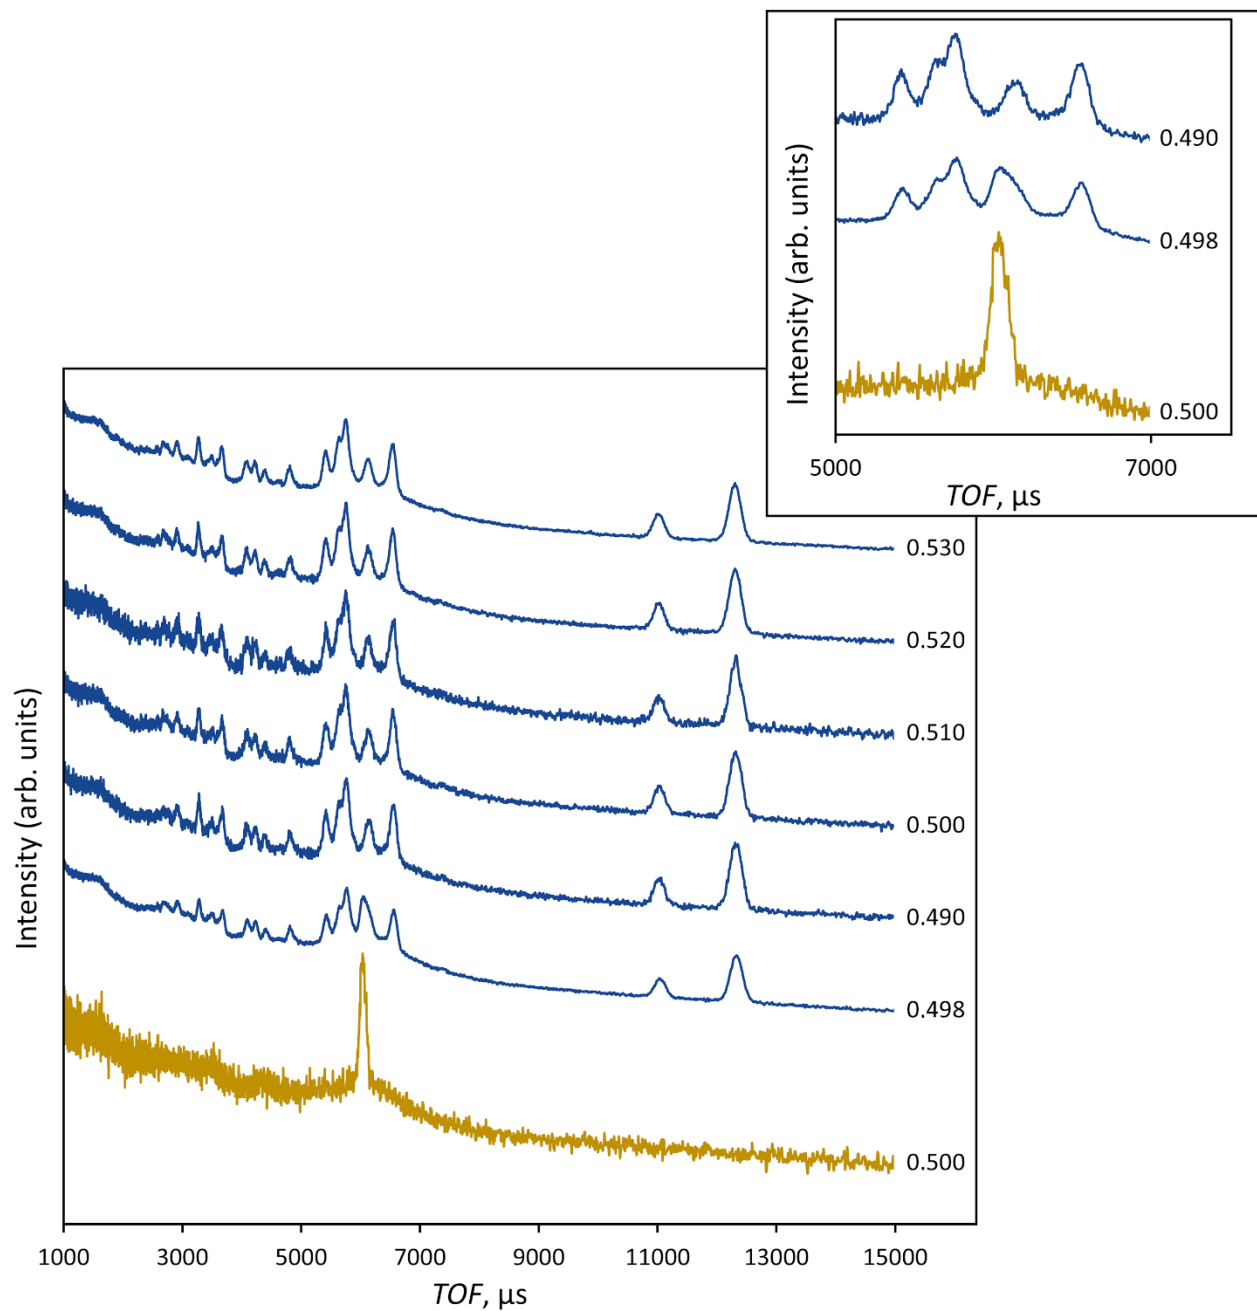

**Figure 2.10:** Neutron powder-diffraction patterns of TFE obtained from GEM, collected at 290 K, shown in the order the data was collected and labelled by starting pressure, in GPa (Form 5 – gold; Form 2 – blue). Insert shows the peak at  $\sim 6000 \mu\text{s}$  at 0.498 GPa looks to be composed of both Form 5 and Form 2.

**Table S2.7:** Crystallographic data for the high-pressure neutron powder studies of TFE at 290 K on GEM

| Pressure (GPa) | wR      | Form | Space Group  | a (Å)    | b (Å)     | c (Å)    | $\alpha$ (°) | $\beta$ (°) | $\gamma$ (°) | V (Å <sup>3</sup> ) | Density (g/cm <sup>3</sup> ) | Z / Z' |
|----------------|---------|------|--------------|----------|-----------|----------|--------------|-------------|--------------|---------------------|------------------------------|--------|
| 0.50           | 0.06247 | 5    | <i>Im-3m</i> | 5.708(2) | 5.708(2)  | 5.708(2) | 90           | 90          | 90           | 185.9(2)            | 1.8412                       | 2 / 1  |
| 0.53           | 0.03729 | 2    | <i>P-1</i>   | 4.911(4) | 8.849(17) | 9.12(2)  | 111.49(5)    | 102.92(2)   | 90.628(16)   | 357.62(11)          | 1.9141                       | 4 / 2  |

**Table S2.8:** Atomic positions for the Form 2 structure refined from the high-pressure neutron powder-diffraction study on GEM at 0.53 GPa.

|   | C1      | D1A     | D1B     | O1      | D1      | C2      | F1       | F2      | F3      | C3      | D3A     | D3B     | O2      | D2      | C4      | F4      | F5      | F6      |
|---|---------|---------|---------|---------|---------|---------|----------|---------|---------|---------|---------|---------|---------|---------|---------|---------|---------|---------|
| x | 0.96432 | 1.13494 | 0.89341 | 1.03042 | 0.91907 | 0.75459 | 0.85440  | 0.53017 | 0.61988 | 0.62321 | 0.77431 | 0.45429 | 0.57878 | 0.44834 | 0.70847 | 0.76932 | 0.51179 | 0.93715 |
| y | 0.22168 | 0.23335 | 0.32514 | 0.16285 | 0.16710 | 0.10668 | -0.03156 | 0.06961 | 0.14535 | 0.28434 | 0.25835 | 0.28988 | 0.16066 | 0.16165 | 0.44304 | 0.55939 | 0.49118 | 0.47150 |
| z | 0.36163 | 0.32700 | 0.40140 | 0.48647 | 0.54254 | 0.22071 | 0.14827  | 0.26320 | 0.10283 | 0.78259 | 0.85661 | 0.81877 | 0.62879 | 0.55518 | 0.77903 | 0.92598 | 0.68621 | 0.74178 |

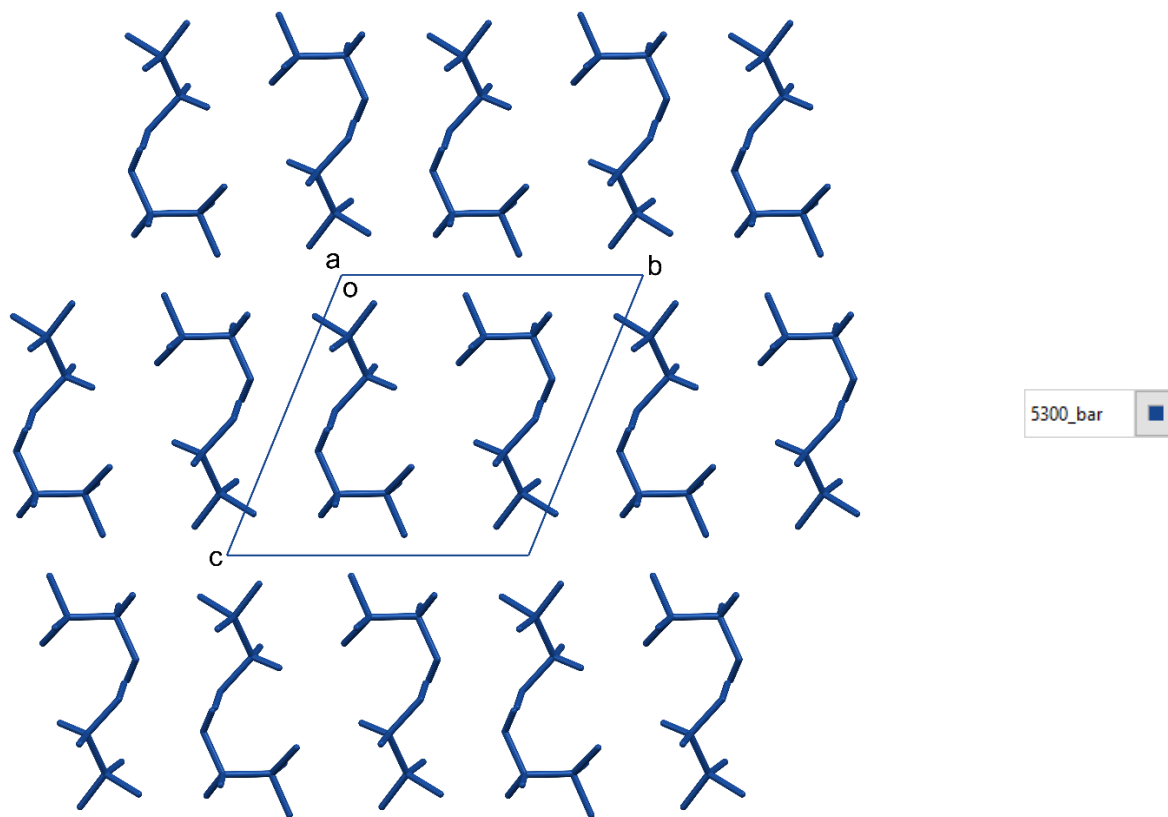**Figure S2.11:** Packing of the TFE structure refined from the neutron powder-diffraction data from GEM at 290 K showing Form 2 at 0.53 GPa.**References**

- 1 A. D. Fortes, *RAL Technical Reports*, 2019, **RAL-TR-2019-002**, 2019.
